# Supplementary material for: Anti-Inflammatory Screening and Molecular Modeling of Some Novel Coumarin Derivatives
Source: PubMed Central journal article supplement (PMC6272174; doi:10.3390/molecules20045374), 2015-03-26
Supplement: molecules-20-05374-s001.pdf [file molecules-20-05374-s001.pdf]

# Supplementary Materials

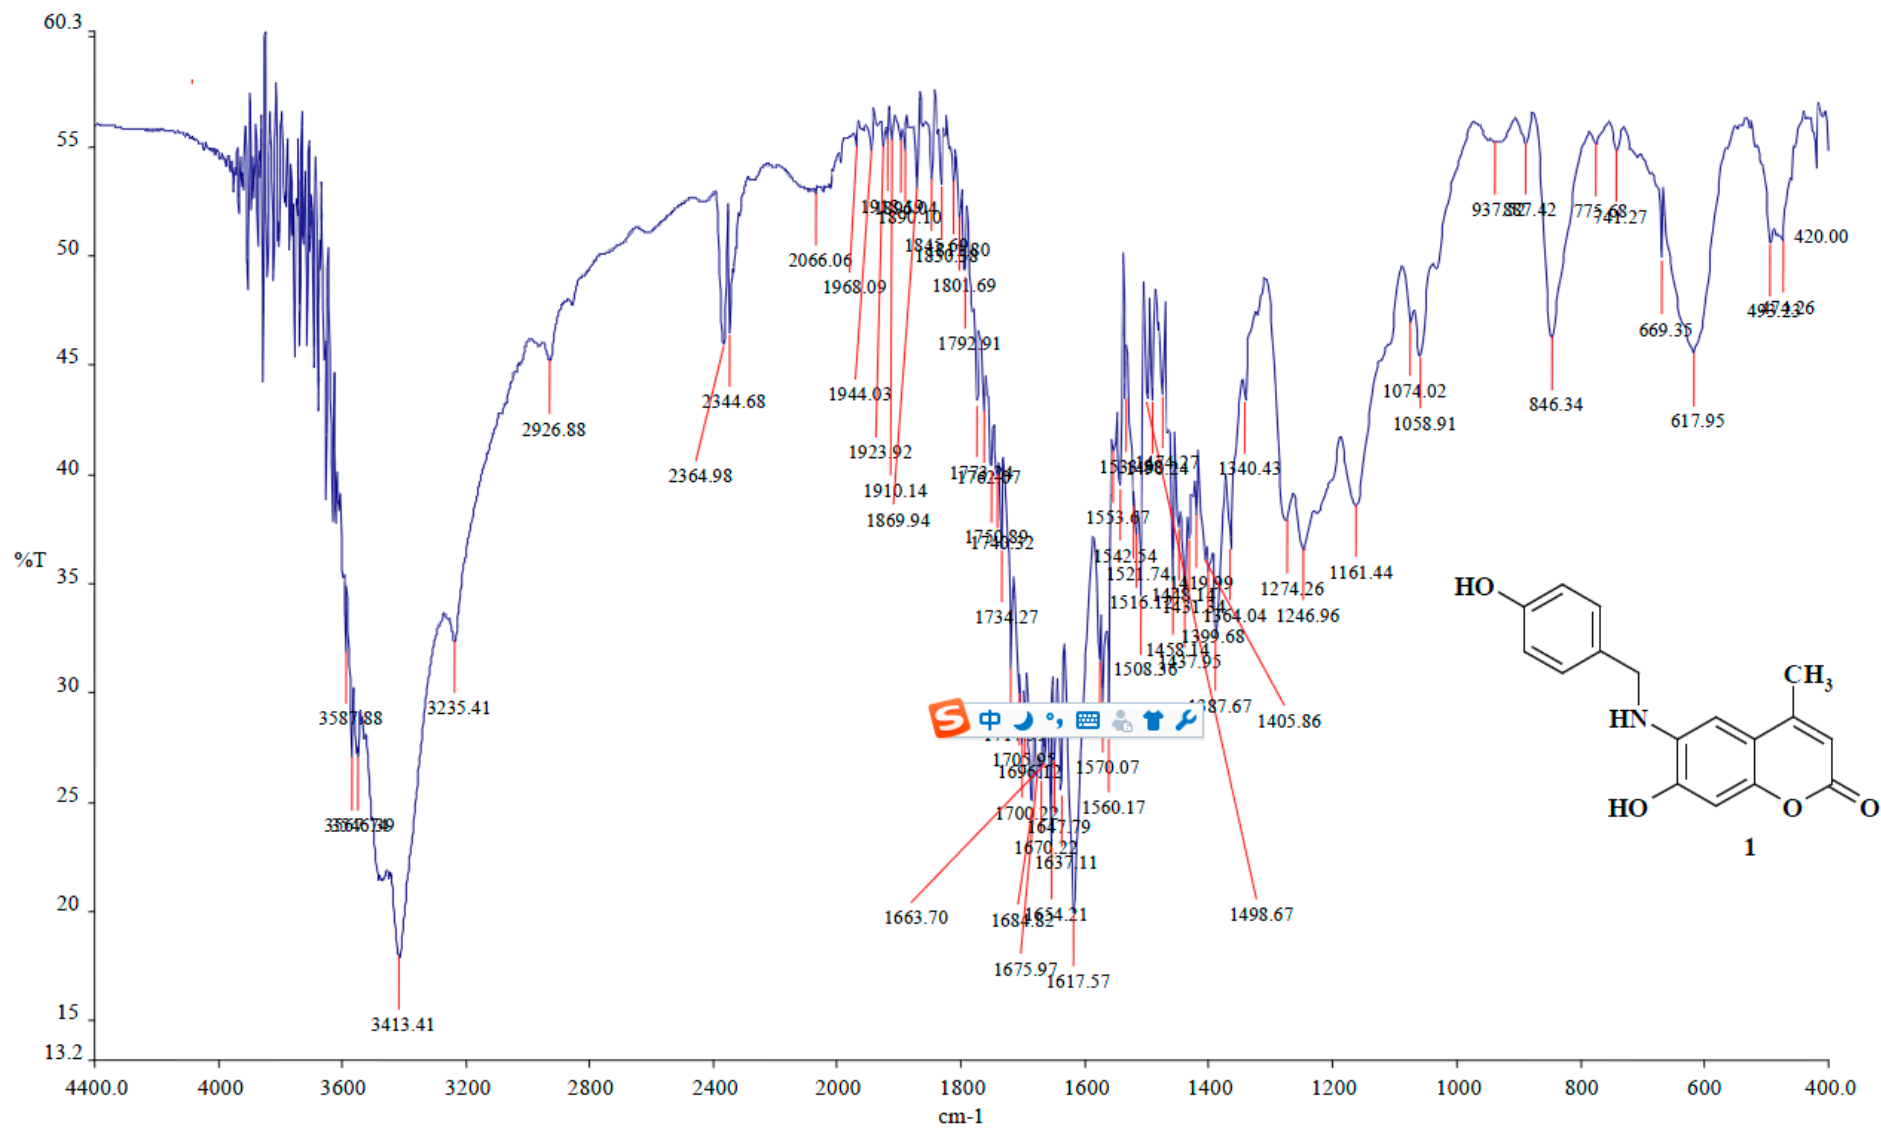

Figure S1. IR of compound 1.

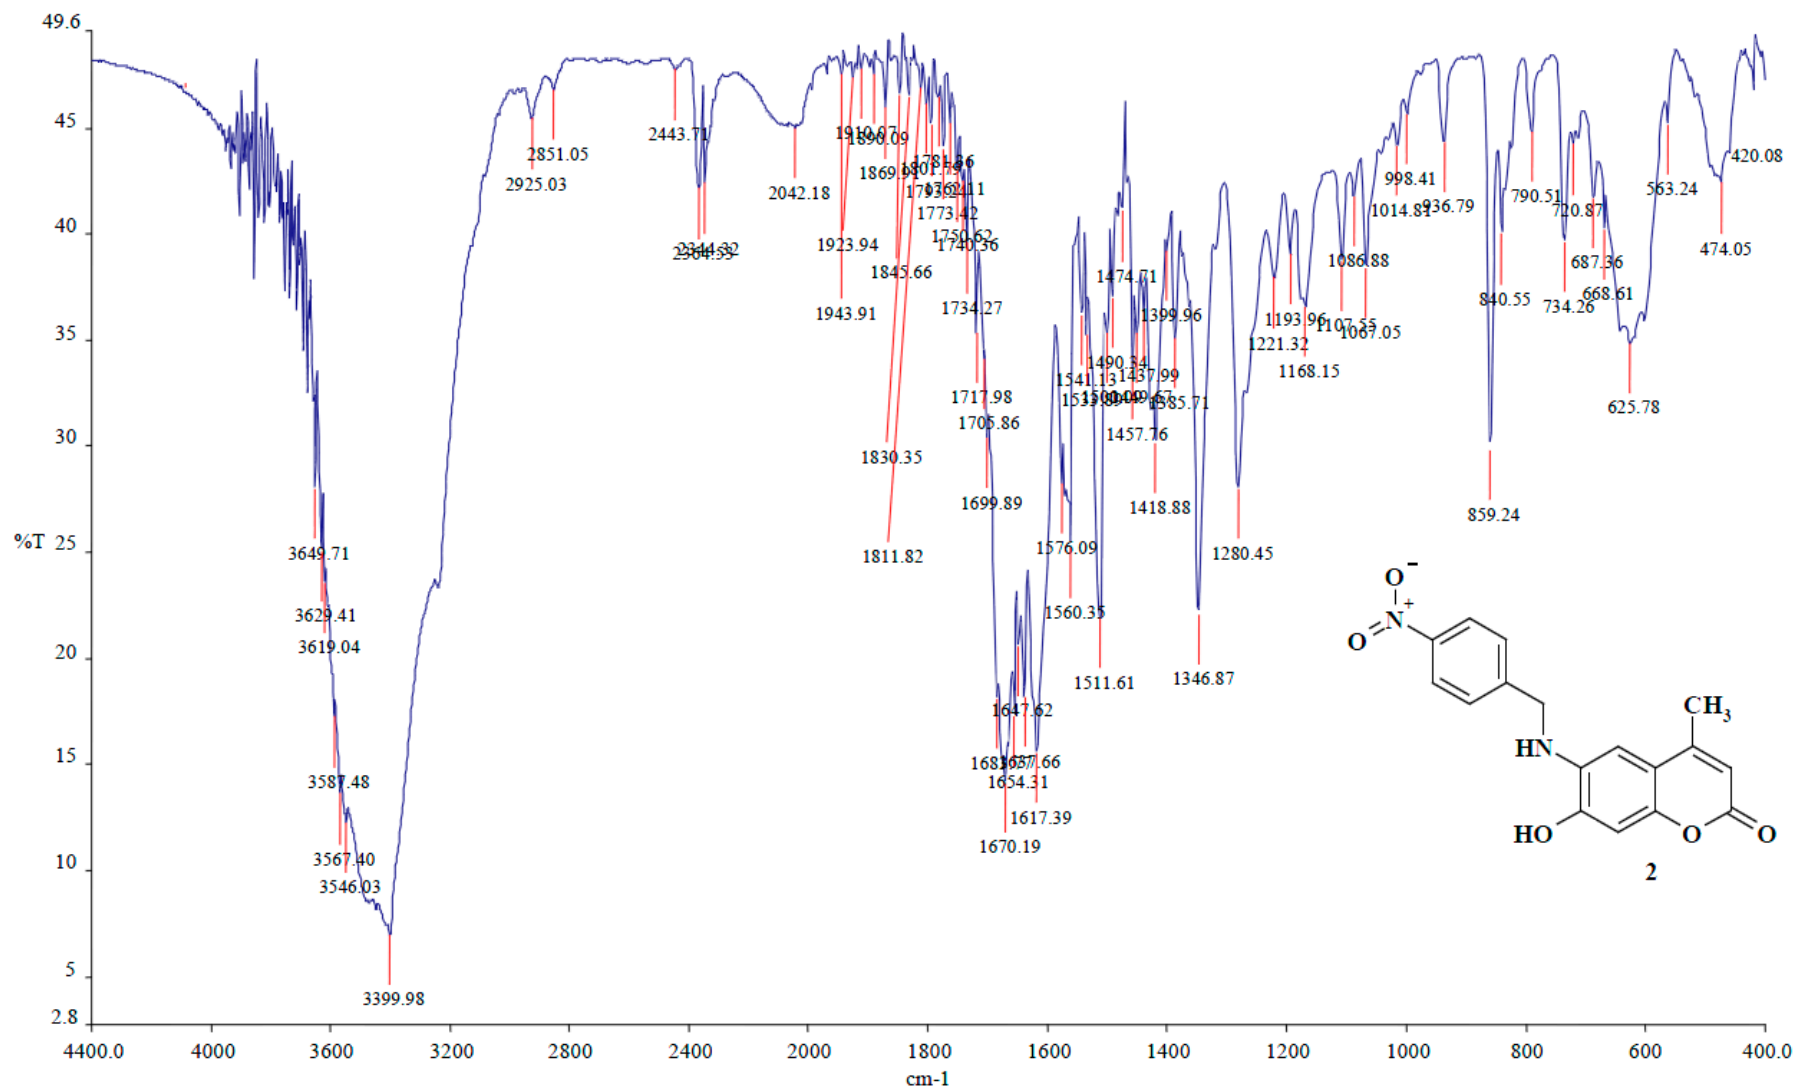

Figure S2. IR of compound 2.

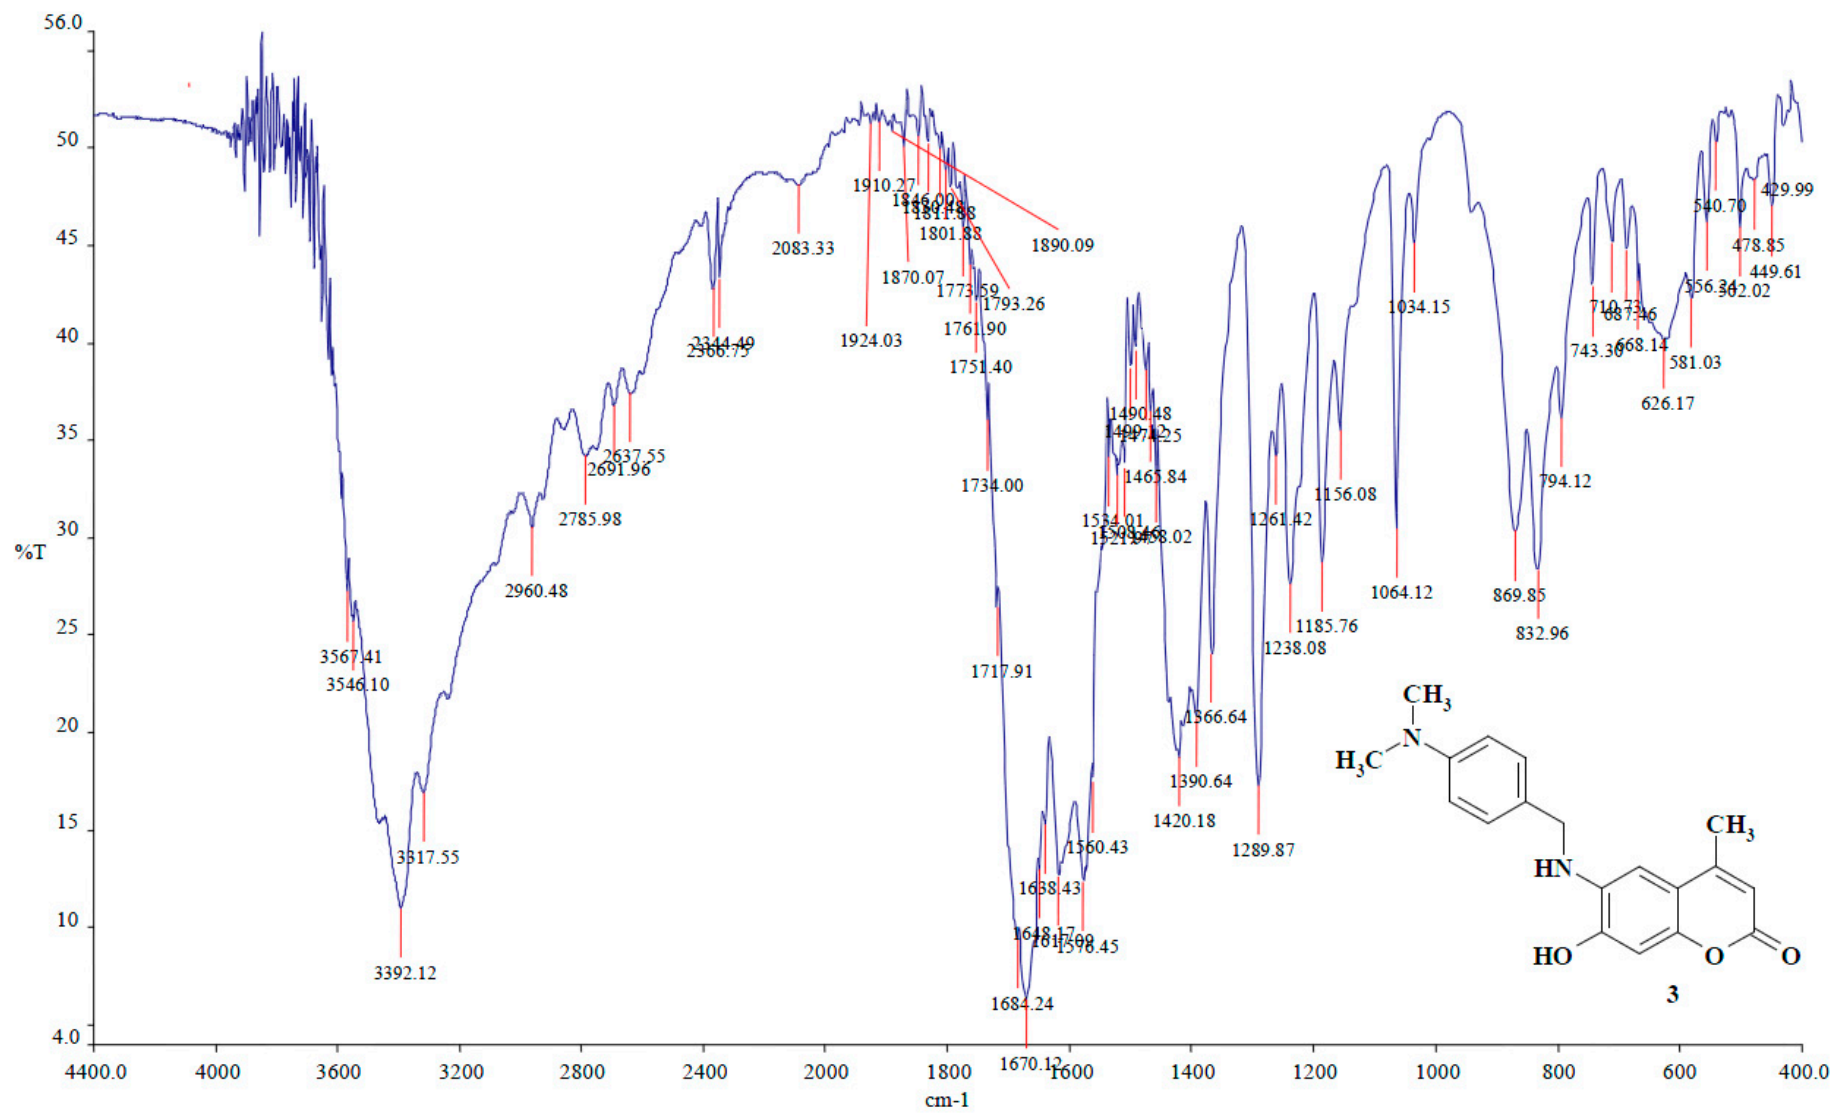

Figure S3. IR of compound 3.

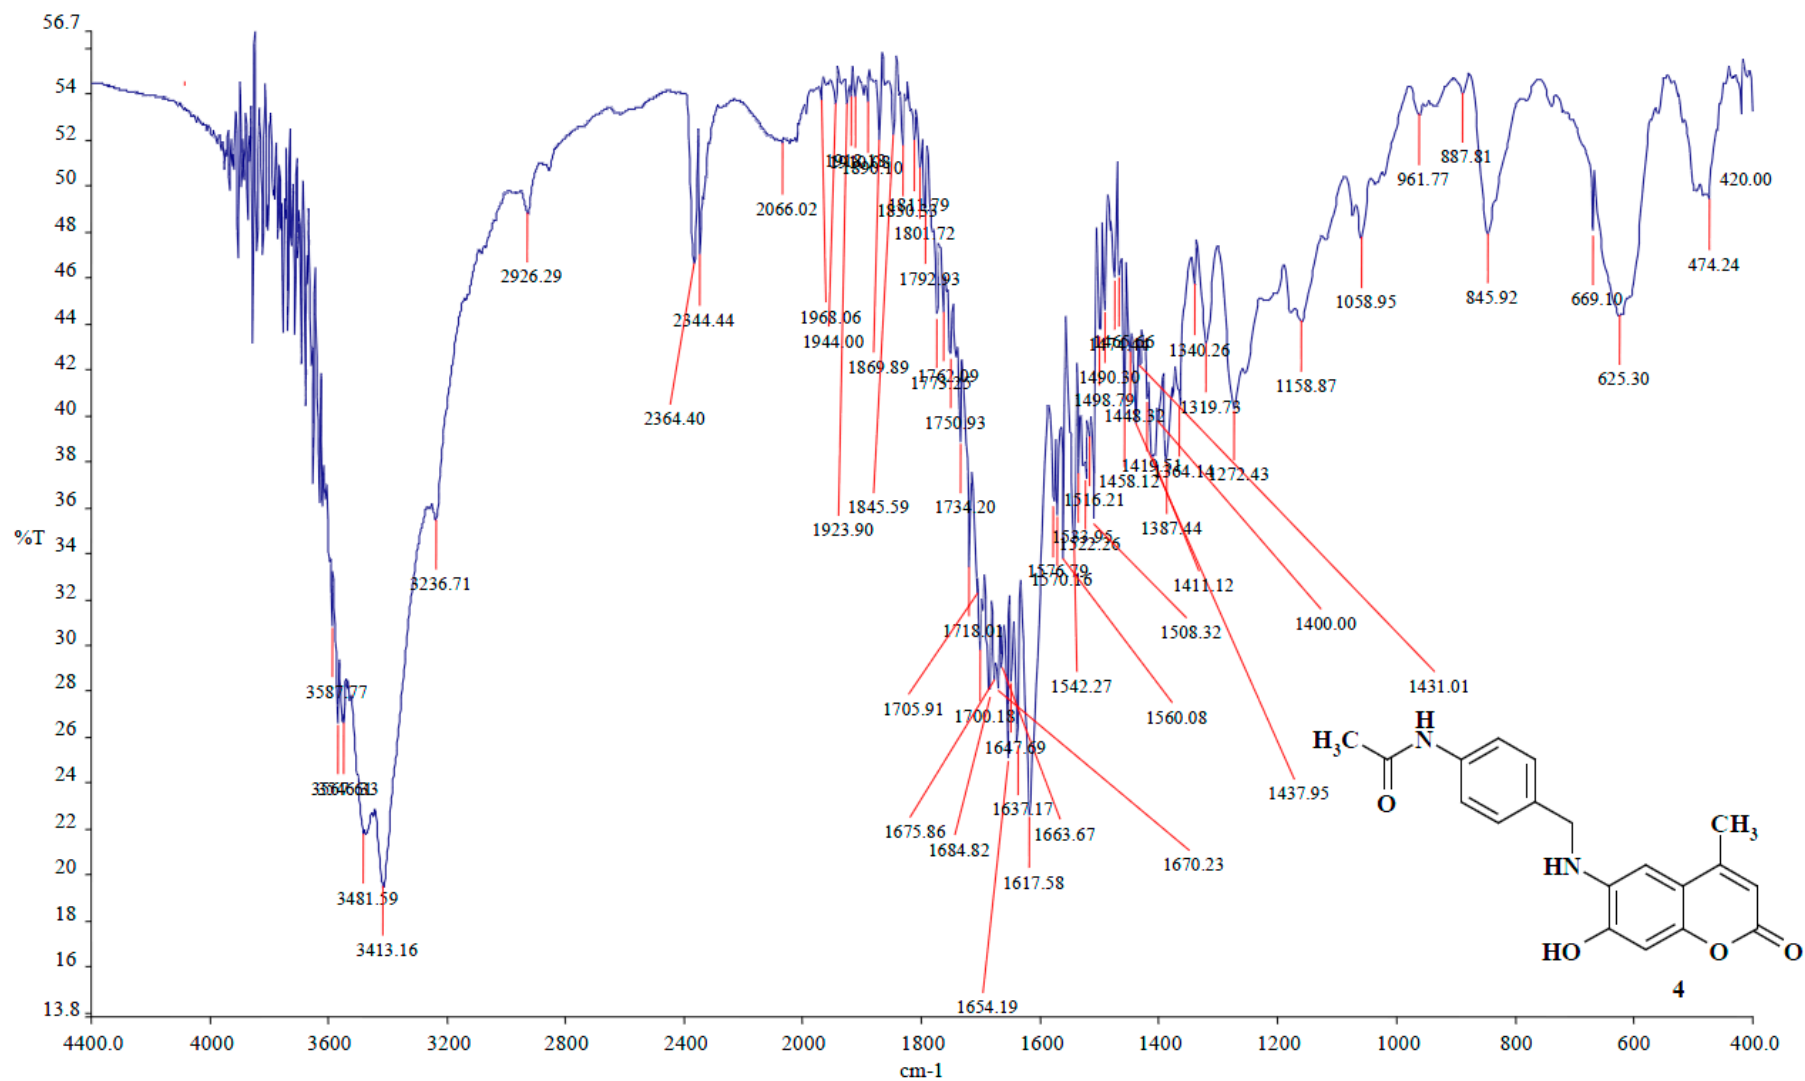

Figure S4. IR of compound 4.

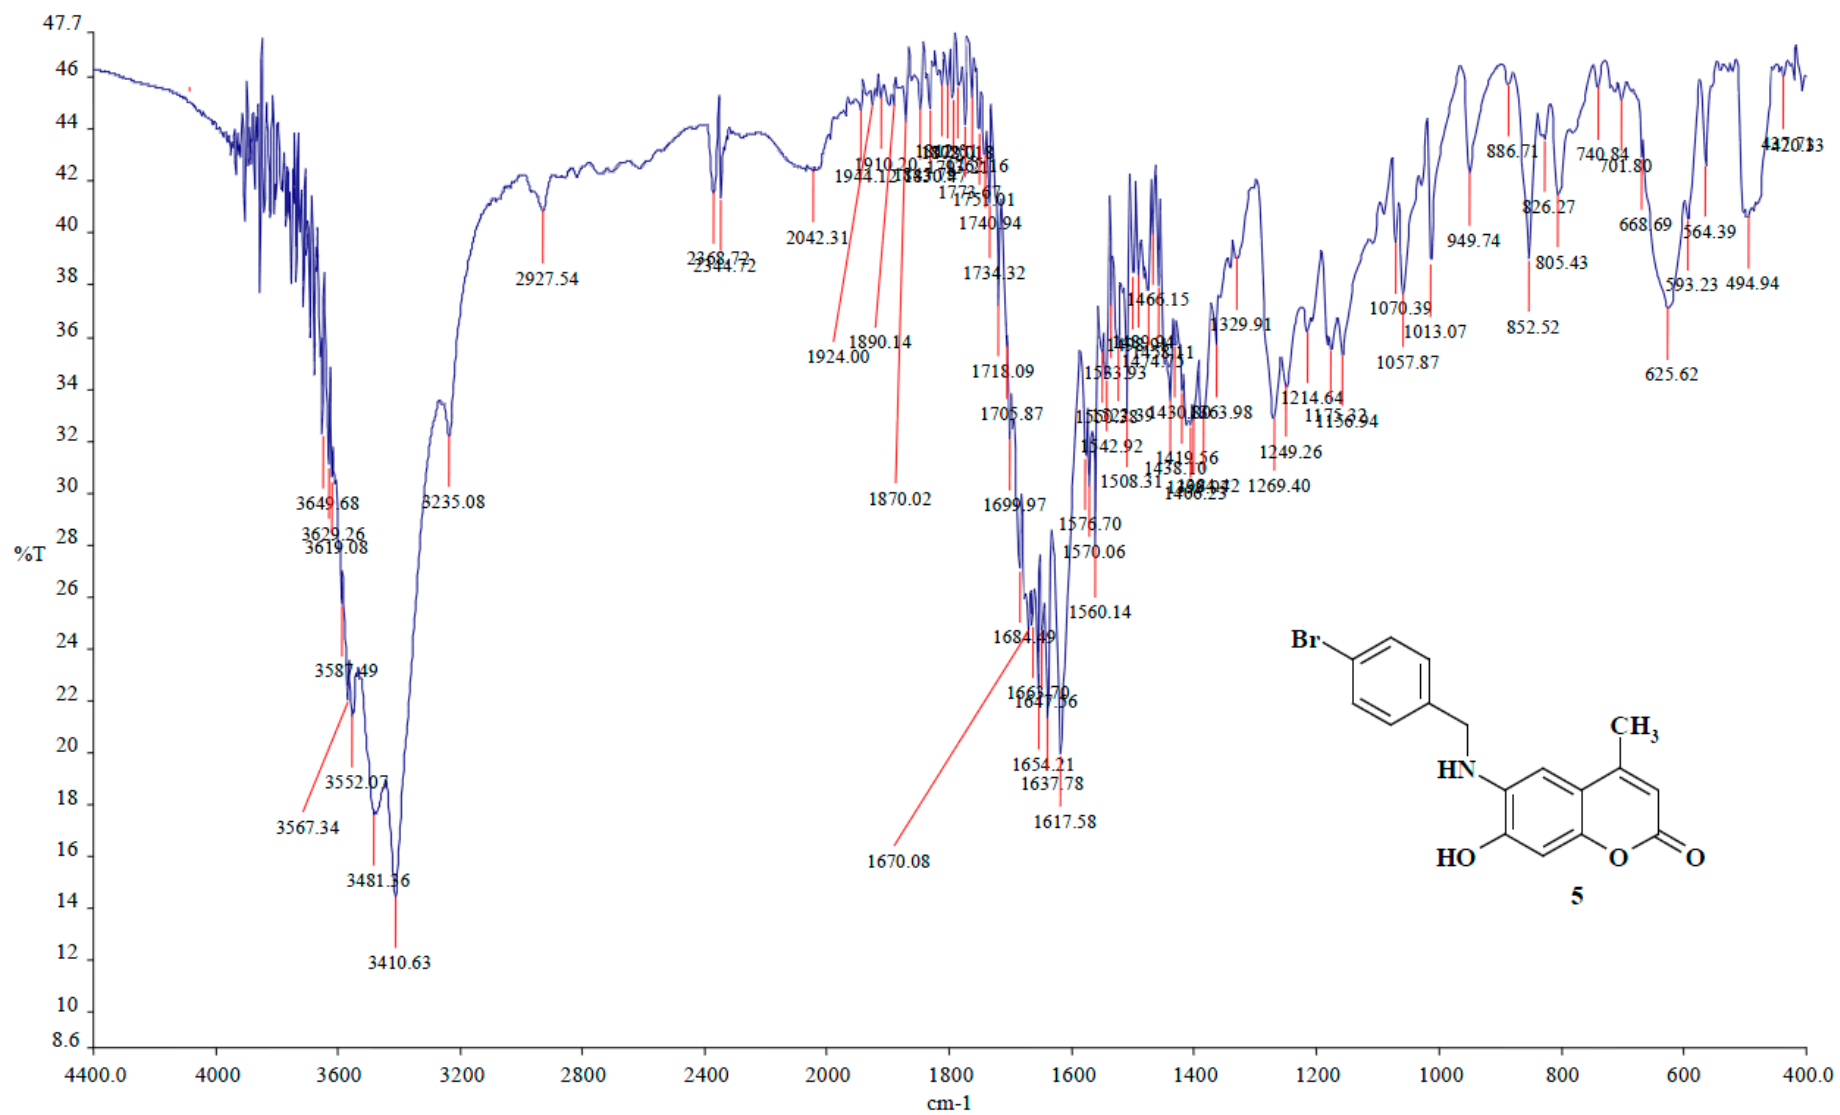

Figure S5. IR of compound 5.

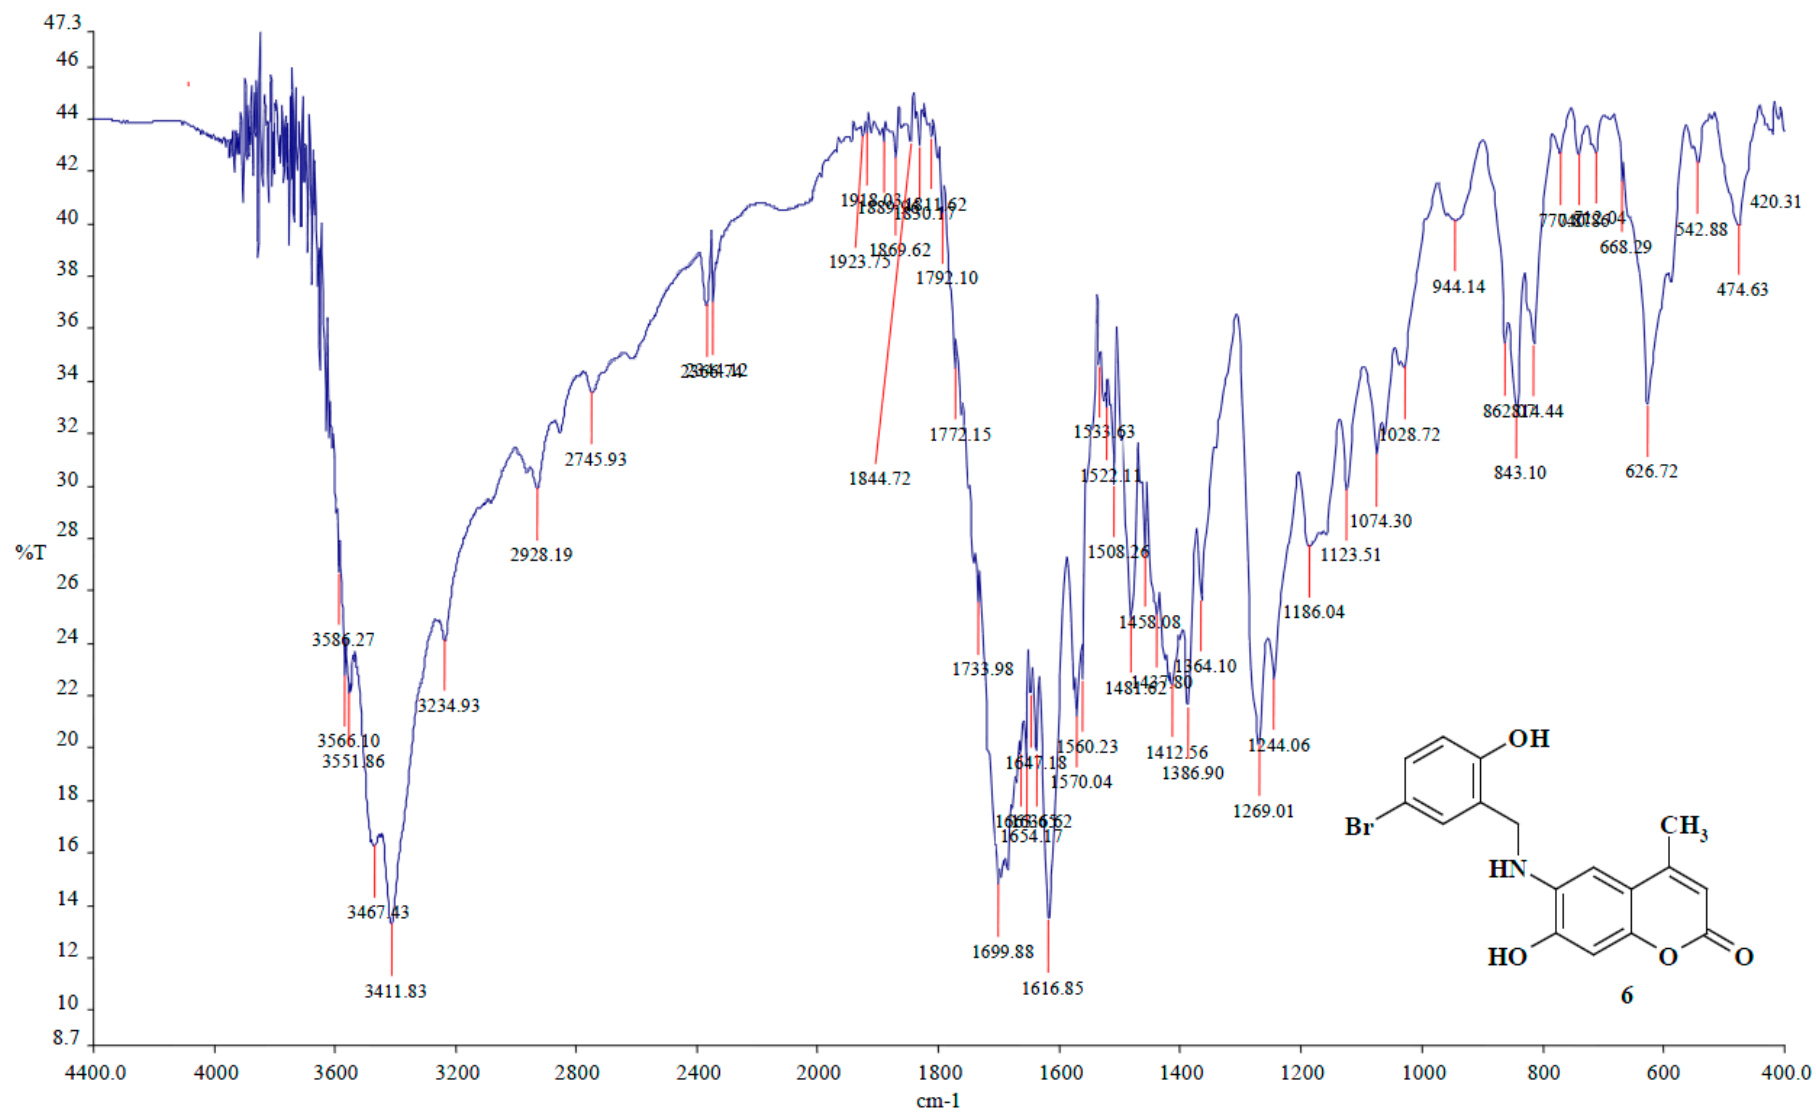

Figure S6. IR of compound 6.

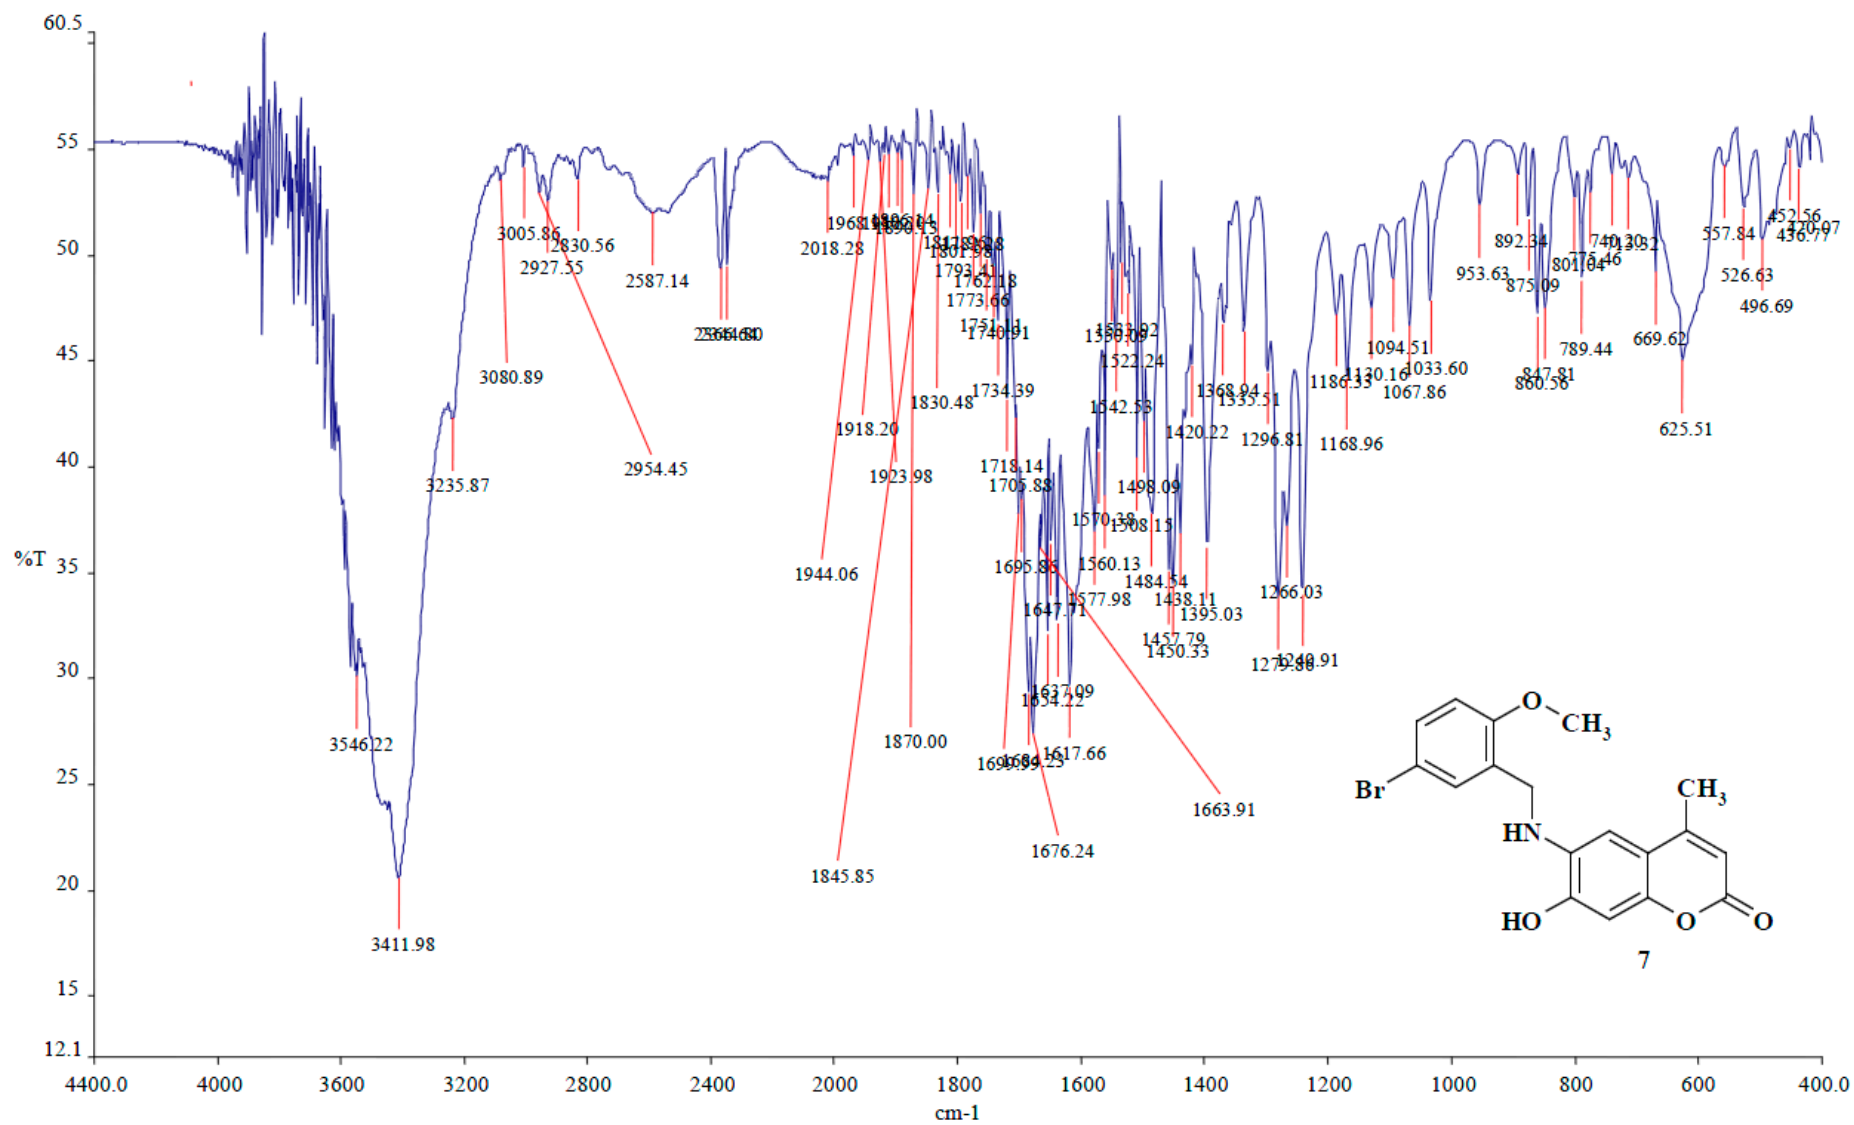

Figure S7. IR of compound 7.

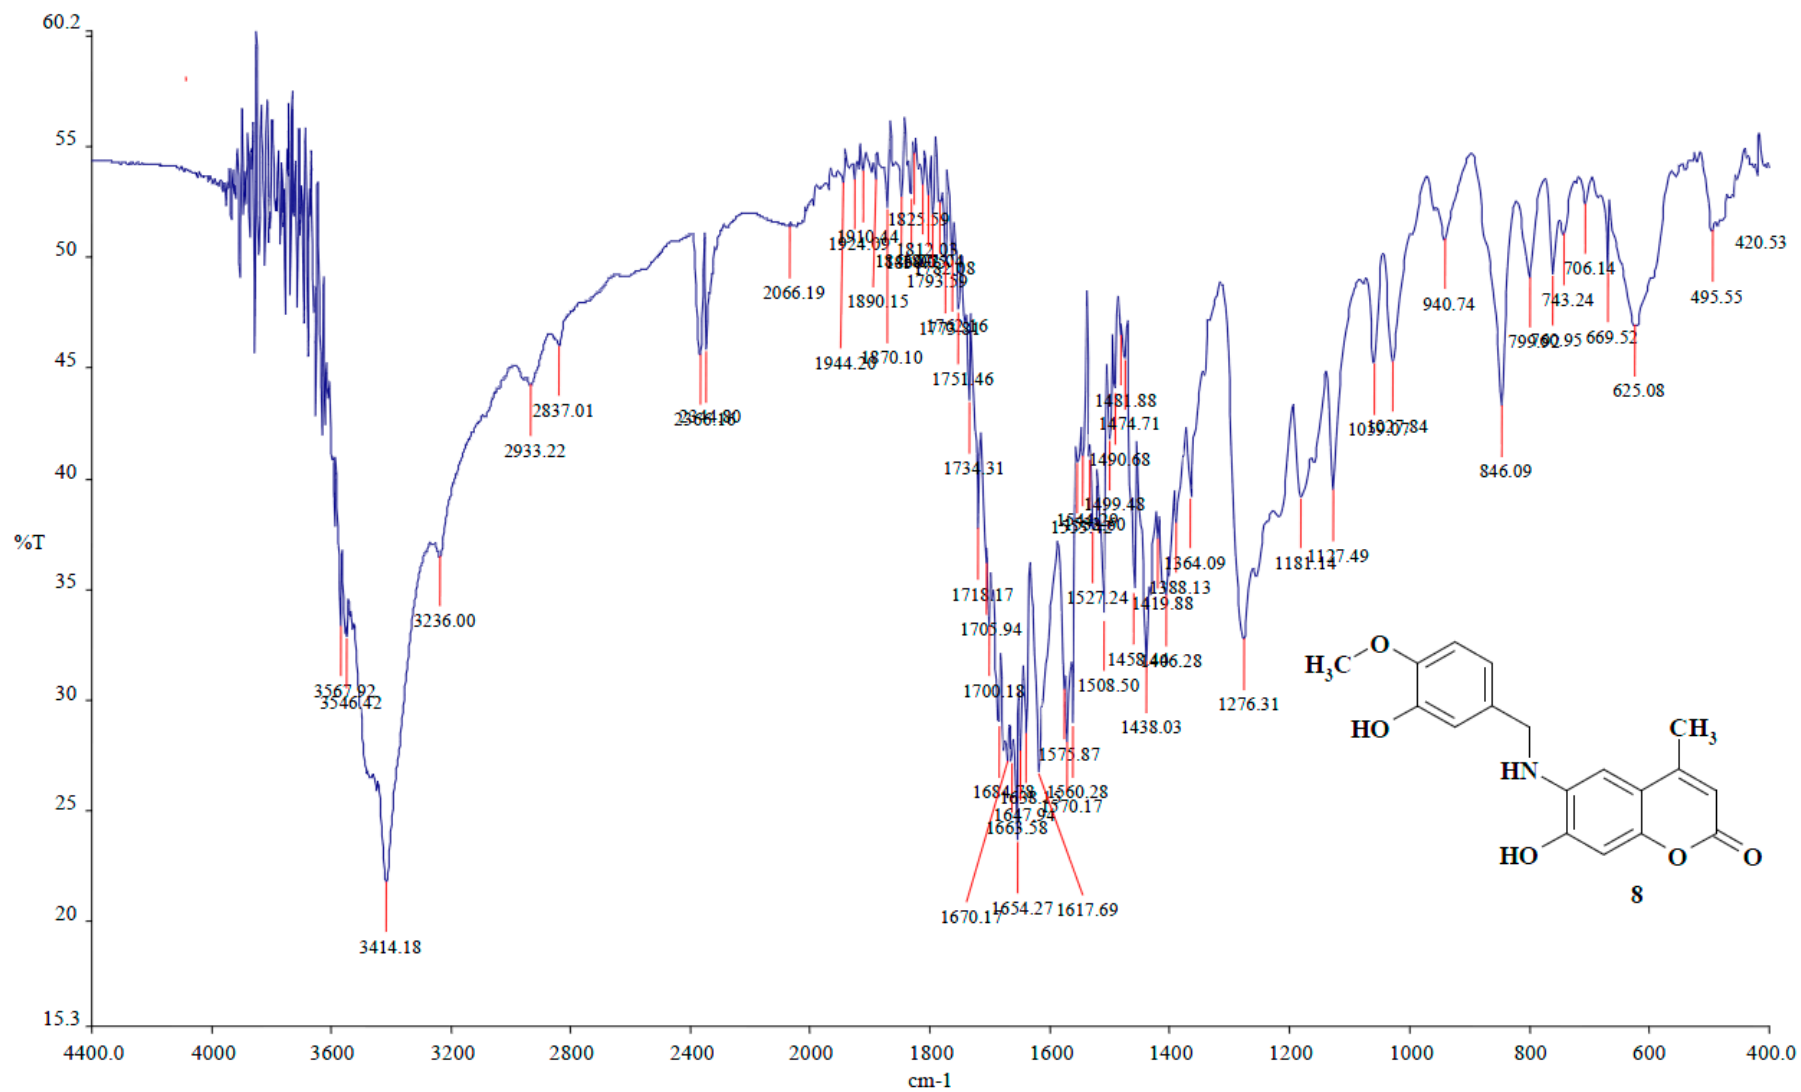

Figure S8. IR of compound 8.



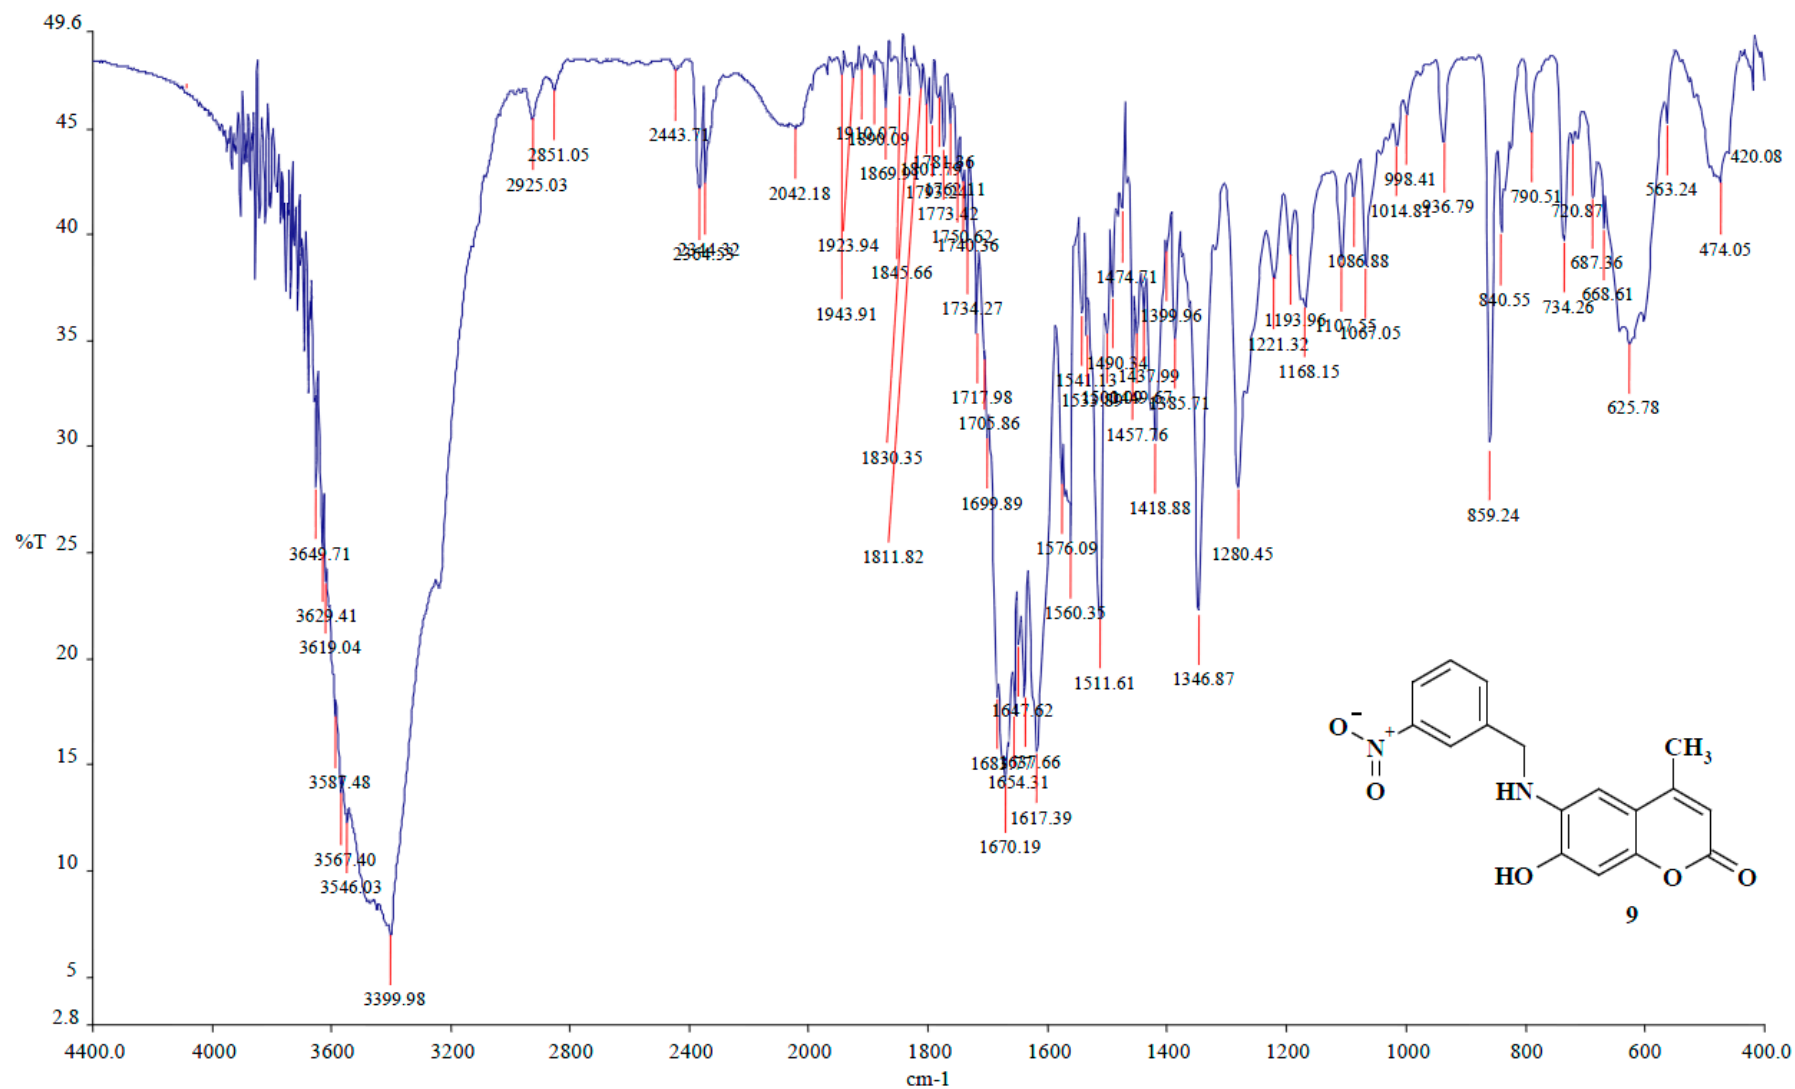

Figure S9. IR of compound 9.

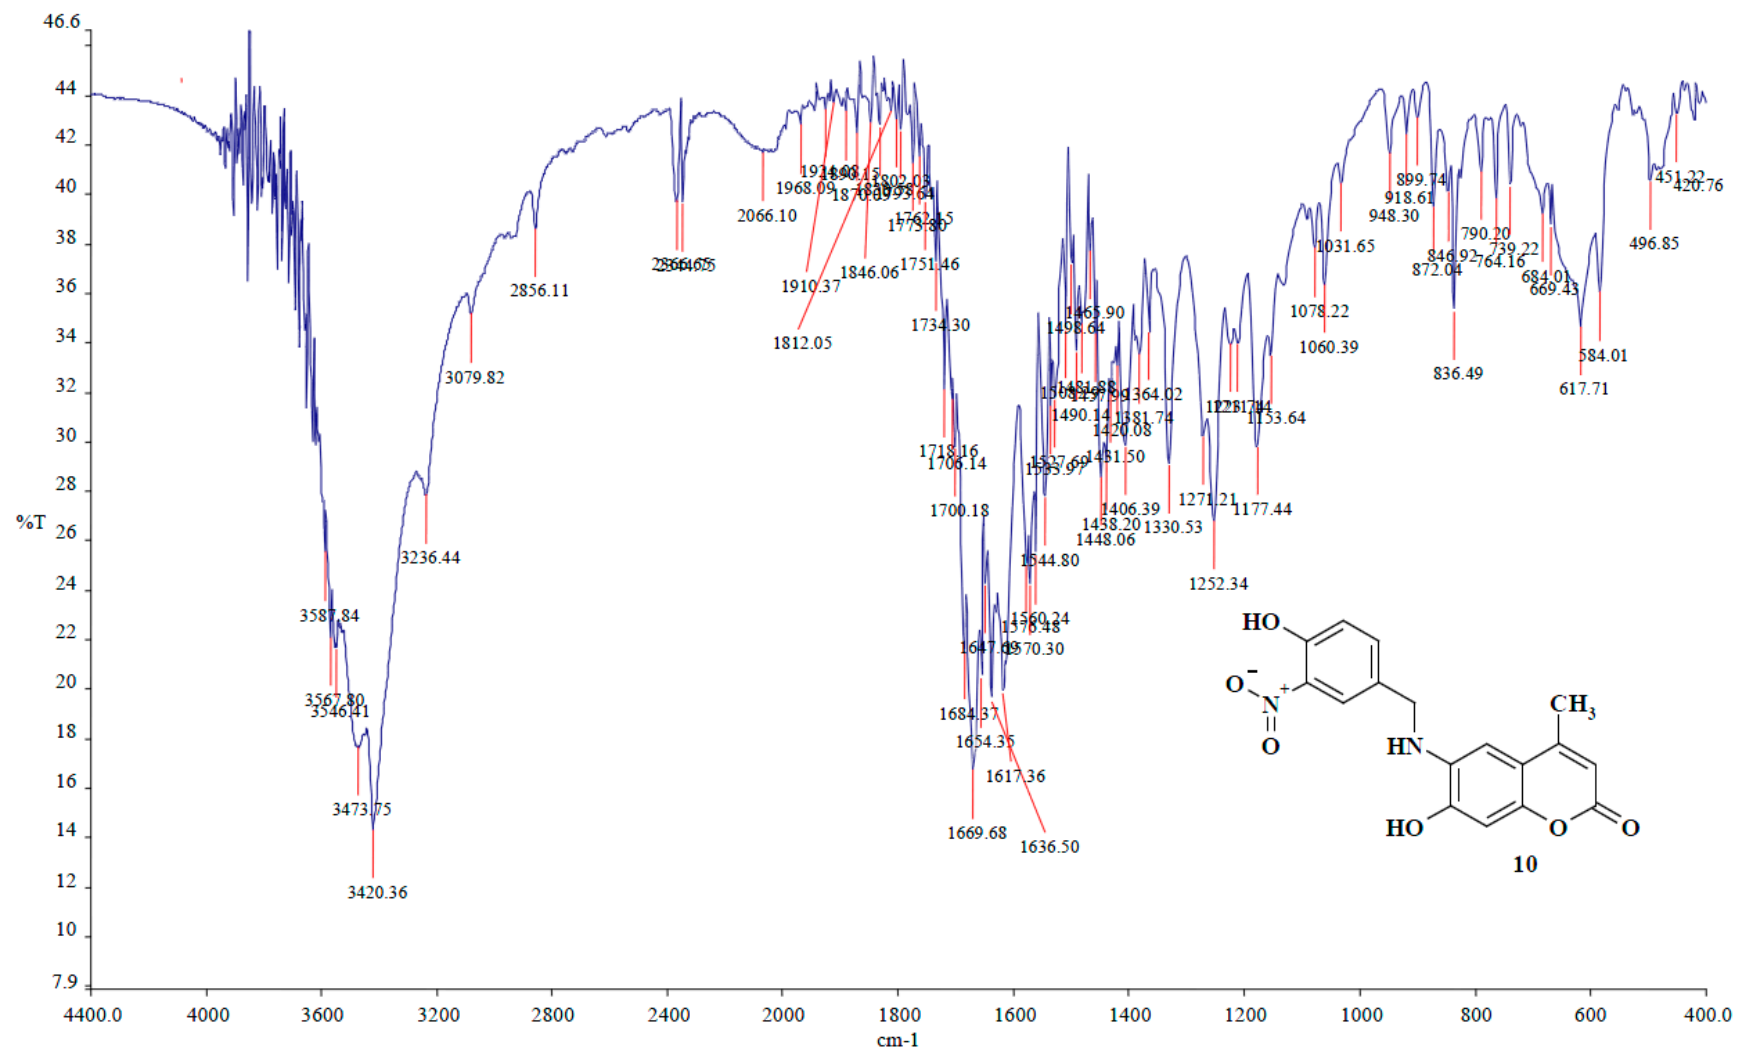

Figure S10. IR of compound 10.

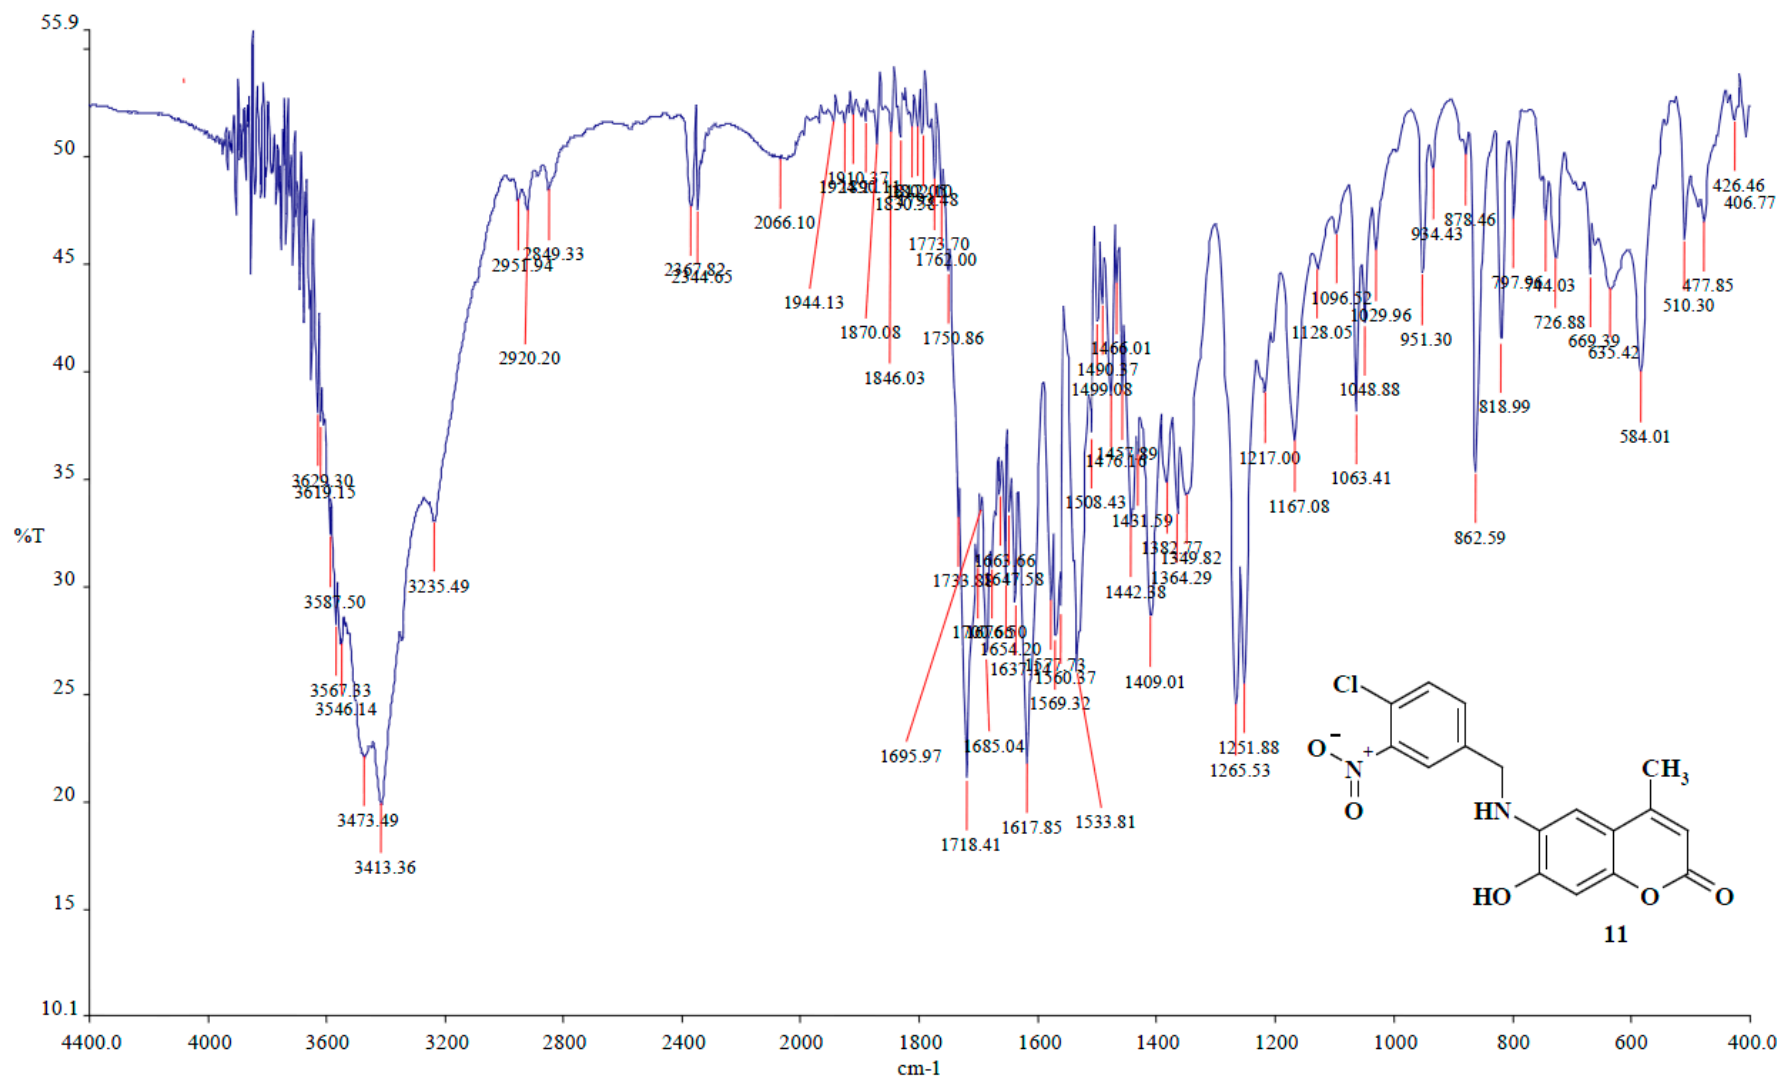

Figure S11. IR of compound 11.

03-Sep-14 18:10:49

**Cairo University  
Micro Analytical Center**

**DI Analysis  
Shimadzu Qp-2010 Plus**

Sample Information  
 Analyzed by : Mai Younis  
 Analyzed : 03/09/2014 06:02:51  
 Sample Name : 6  
 Sample ID :  
 Customer Name : Dr.Radwan Saad - Medicine - Helwan  
 Data File : C:\GCMSsolution\Data\Project1\6.QGD  
 Org Data File : C:\GCMSsolution\Data\Project1\6.QGD  
 Method File : C:\GCMSsolution\Data\Project1\A.GABR.qgm  
 Org Method File : C:\GCMSsolution\Data\Project1\A.GABR.qgm  
 Report File :  
 Tuning File : C:\GCMSsolution\System\Tune1\default1.qgt  
 \$Endf\$Modified by : Mai Younis  
 Modified : 03/09/2014 06:07:26

Method  
 Analytical Line 1  
 IonSourceTemp :250.00 °C  
 [MS Table]  
 -Group 1 - Event 1-  
 Start Time :0.00min  
 End Time :10.00min  
 ACQ Mode :Scan  
 Event Time :0.50sec  
 Scan Speed :1428  
 Start m/z :50.00  
 End m/z :700.00  
 Electron Voltage : 70 eV  
 Ionization Mode : EI

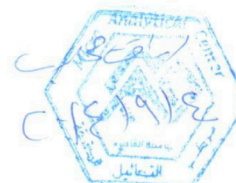

C:\GCMSsolution\Data\Project1\6.QGD

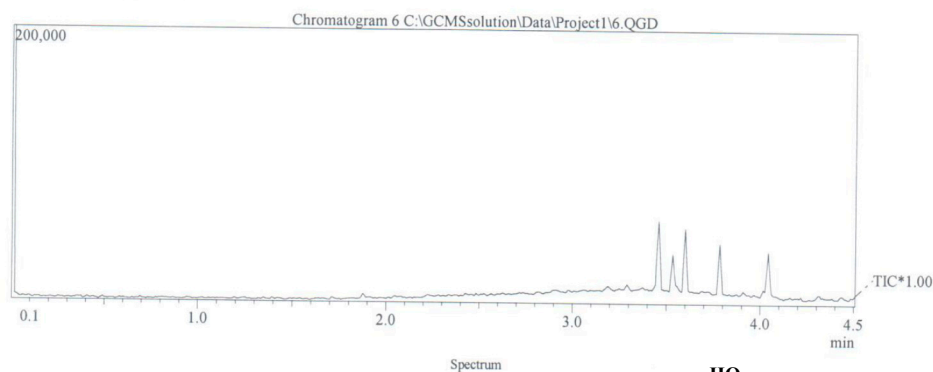

Line#:1 R.Time:4.0(Scan#:483)  
 MassPeaks:64  
 RawMode:Single 4.0(483) BasePeak:191(937)  
 BG Mode:None Group 1 - Event 1

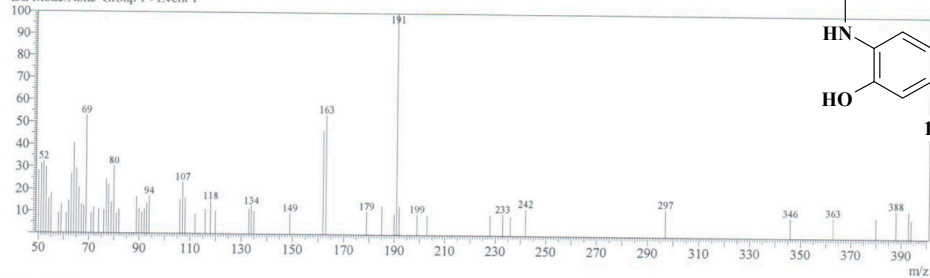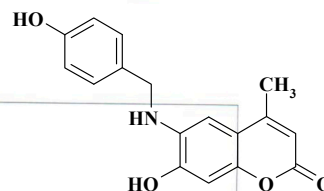

## Mass Table

Line#:1 R. Time:4.0(Scan#:483)

MassPeaks:64

RawMode:Single 4.0(483) BasePeak:191(937)

BG Mode:None Group 1 - Event 1

| # | m/z   | Abs. In | Rel. Int. | # | m/z   | Abs. In | Rel. Int. | # | m/z   | Abs. In | Rel. Int. |
|---|-------|---------|-----------|---|-------|---------|-----------|---|-------|---------|-----------|
| 1 | 50.00 | 263     | 28.07     | 4 | 53.00 | 278     | 29.67     | 7 | 58.00 | 86      | 9.18      |
| 2 | 51.00 | 294     | 31.38     | 5 | 54.00 | 146     | 15.58     | 8 | 59.00 | 122     | 13.02     |
| 3 | 52.00 | 303     | 32.34     | 6 | 55.00 | 170     | 18.14     | 9 | 61.00 | 84      | 8.96      |

**Figure S12. Mass Spectra of compound 1.**

03-Sep-14 17:45:42

**Cairo University  
Micro Analytical Center**

**DI Analysis  
Shimadzu Qp-2010 Plus**

Sample Information  
 Analyzed by : Mai Younis  
 Analyzed : 03/09/2014 05:36:41  
 Sample Name : 4  
 Sample ID :  
 Customer Name : Dr.Radwan Saad - Medicine - Helwan  
 Data File : C:\GCMSsolution\Data\Project1\4.QGD  
 Org Data File : C:\GCMSsolution\Data\Project1\4.QGD  
 Method File : C:\GCMSsolution\Data\Project1\A.GABR.qgm  
 Org Method File : C:\GCMSsolution\Data\Project1\A.GABR.qgm  
 Report File :  
 Tuning File : C:\GCMSsolution\System\Tune1\_default1.qgt  
 SEndfSModified by : Mai Younis  
 Modified : 03/09/2014 05:41:10

Method  
 Analytical Line 1  
 [MS Table]  
 --Group 1 - Event 1--  
 Start Time : 0.00min  
 End Time : 10.00min  
 ACQ Mode : Scan  
 Event Time : 0.50sec  
 Scan Speed : 1428  
 Start m/z : 50.00  
 End m/z : 700.00  
 Electron Voltage : 70 eV  
 Ionization Mode : EI

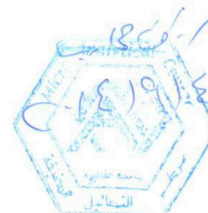

C:\GCMSsolution\Data\Project1\4.QGD

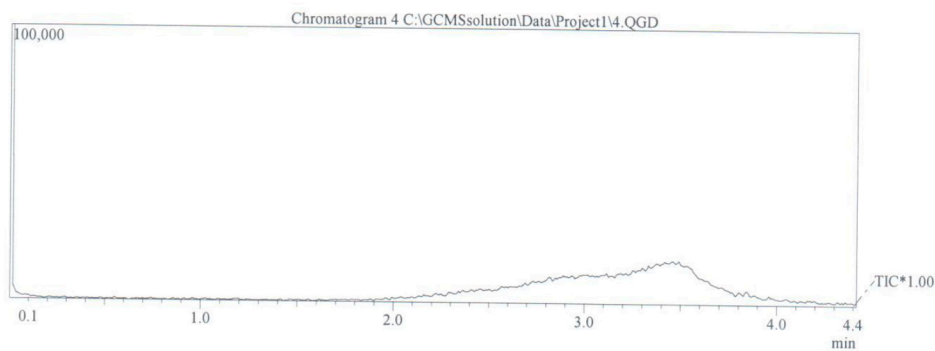

Line#: 1 R.Time: 3.5(Scan#: 416)  
 MassPeaks: 56  
 RawMode: Single 3.5(416) BasePeak: 98(4023)  
 BG Mode: None Group 1 - Event 1

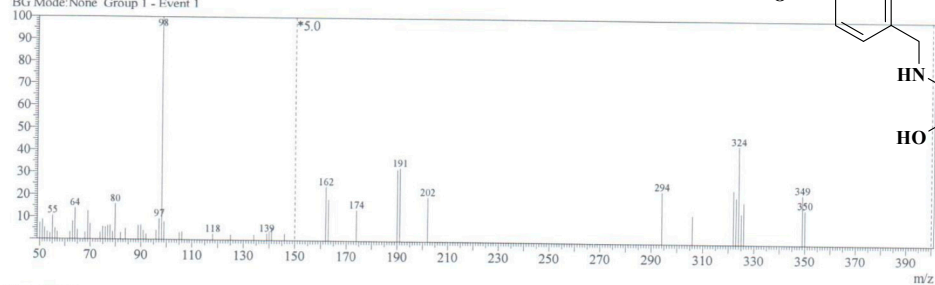

Mass Table

Line#: 1 R.Time: 3.5(Scan#: 416)

MassPeaks: 56

RawMode: Single 3.5(416) BasePeak: 98(4023)

BG Mode: None Group 1 - Event 1

| # | m/z   | Abs. In | Rel. Int. | # | m/z   | Abs. In | Rel. Int. | # | m/z   | Abs. In | Rel. Int. |
|---|-------|---------|-----------|---|-------|---------|-----------|---|-------|---------|-----------|
| 1 | 50.00 | 289     | 7.18      | 4 | 53.00 | 135     | 3.36      | 7 | 56.00 | 194     | 4.82      |
| 2 | 51.00 | 354     | 8.80      | 5 | 54.00 | 106     | 2.63      | 8 | 57.00 | 135     | 3.36      |
| 3 | 52.00 | 206     | 5.12      | 6 | 55.00 | 423     | 10.51     | 9 | 62.00 | 132     | 3.28      |

**Figure S13. Mass Spectra of compound 2.**

12-Oct-14 20:42:43

**Cairo University  
Micro Analytical Center**

**DI Analysis  
Shimadzu Qp-2010 Plus**

Sample Information  
 Analyzed by : A.GABR  
 Analyzed : 12/10/2014 08:34:20 م  
 Sample Name : 10  
 Sample ID :  
 Customer Name : رضوان الحجار - صينله حلوان  
 Data File : C:\GCMSsolution\Data\Project1\10.QGD  
 Org Data File : C:\GCMSsolution\Data\Project1\10.QGD  
 Method File : C:\GCMSsolution\Data\Project1\A.GABR.qgm  
 Org Method File : C:\GCMSsolution\Data\Project1\A.GABR.qgm  
 Report File :  
 Tuning File : C:\GCMSsolution\System\Tune1\default1.qgt  
 SEndIfSModified by : A.GABR  
 Modified : 12/10/2014 08:38:47 م

Method  
 Analytical Line 1  
 [MS Table]  
 IonSourceTemp :250.00 °C  
 -Group 1 - Event 1-  
 Start Time :0.00min  
 End Time :10.00min  
 Scan :Scan  
 ACQ Mode :Scan  
 Event Time :0.50sec  
 Scan Speed :769  
 Start m/z :50.00  
 End m/z :400.00  
 Electron Voltage :70 eV  
 Ionization Mode :EI

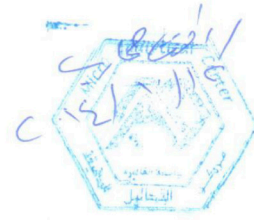

C:\GCMSsolution\Data\Project1\10.QGD

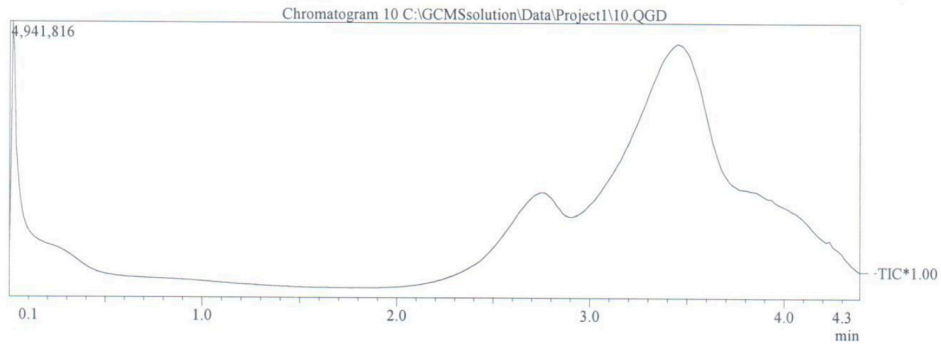

Line#:1 R.Time:1.8(Scan#:215)  
 MassPeaks:136  
 RawMode:Single 1.8(215) BasePeak:191(339)  
 BG Mode:Averaged 1.8-1.8(211-211) Group 1 - Event 1

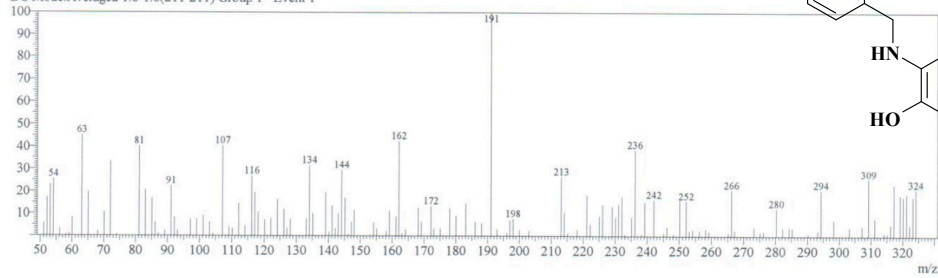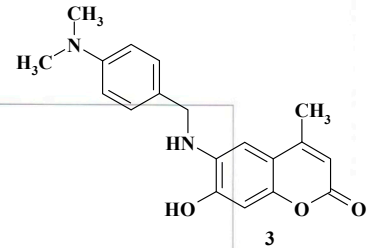

Mass Table  
 Line#:1 R.Time:1.8(Scan#:215)  
 MassPeaks:136  
 RawMode:Single 1.8(215) BasePeak:191(339)  
 BG Mode:Averaged 1.8-1.8(211-211) Group 1 - Event 1

| # | m/z   | Abs. In | Rel. Int. | # | m/z   | Abs. In | Rel. Int. | # | m/z   | Abs. In | Rel. Int. |
|---|-------|---------|-----------|---|-------|---------|-----------|---|-------|---------|-----------|
| 1 | 51.05 | 19      | 5.60      | 4 | 54.10 | 86      | 25.37     | 7 | 59.10 | 4       | 1.18      |
| 2 | 52.10 | 58      | 17.11     | 5 | 56.10 | 11      | 3.24      | 8 | 60.05 | 28      | 8.26      |
| 3 | 53.05 | 78      | 23.01     | 6 | 58.10 | 3       | 0.88      | 9 | 63.05 | 153     | 45.13     |

**Figure S14. Mass spectra of compound 3.**

03-Sep-14 18:01:53

**Cairo University  
Micro Analytical Center**

**DI Analysis  
Shimadzu Qp-2010 Plus**

Sample Information  
 Analyzed by : Mai Younis  
 Analyzed : 03/09/2014 05:57:19  
 Sample Name : 5  
 Sample ID :  
 Customer Name : Dr.Radwan Saad - Medicine - Helwan  
 Data File : C:\GCMSsolution\Data\Project1\5.QGD  
 Org Data File : C:\GCMSsolution\Data\Project1\5.QGD  
 Method File : C:\GCMSsolution\Data\Project1\A.GABR.qgm  
 Org Method File : C:\GCMSsolution\Data\Project1\A.GABR.qgm  
 Report File :  
 Tuning File : C:\GCMSsolution\System\Tune1\default1.qgt  
 SEndIf\$Modified by : Mai Younis  
 Modified : 03/09/2014 06:00:54

Method  
 Analytical Line 1  
 IonSourceTemp :250.00 °C  
 [MS Table]  
 --Group 1 - Event 1--  
 Start Time :0.00min  
 End Time :10.00min  
 ACQ Mode :Scan  
 Event Time :0.50sec  
 Scan Speed :1428  
 Start m/z :50.00  
 End m/z :700.00  
 Electron Voltage : 70 eV  
 Ionization Mode : EI

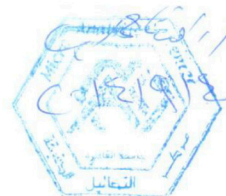

C:\GCMSsolution\Data\Project1\5.QGD

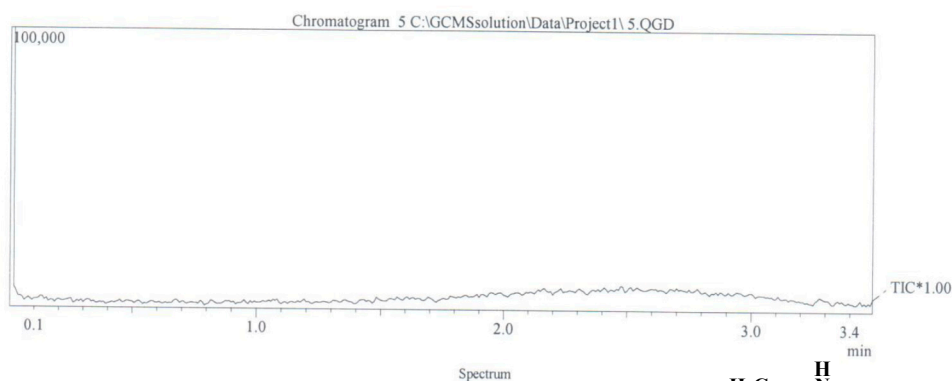

Line#:1 R.Time:2.8(Scan#:334)  
 MassPeaks:48  
 RawMode:Single 2.8(334) BasePeak:106(567)  
 BG Mode:None Group 1 - Event 1

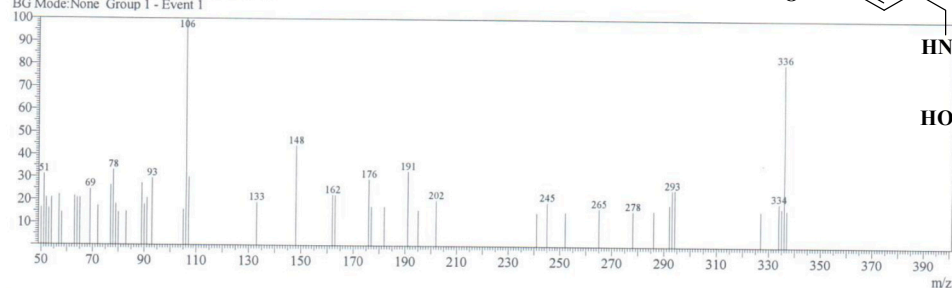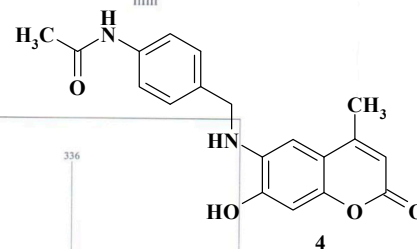

Mass Table

Line#:1 R.Time:2.8(Scan#:334)

MassPeaks:48

RawMode:Single 2.8(334) BasePeak:106(567)

BG Mode:None Group 1 - Event 1

| # | m/z   | Abs. In | Rel. Int. | # | m/z   | Abs. In | Rel. Int. | # | m/z   | Abs. In | Rel. Int. |
|---|-------|---------|-----------|---|-------|---------|-----------|---|-------|---------|-----------|
| 1 | 50.00 | 94      | 16.58     | 4 | 53.00 | 92      | 16.23     | 7 | 58.00 | 82      | 14.46     |
| 2 | 51.00 | 177     | 31.22     | 5 | 54.00 | 118     | 20.81     | 8 | 63.00 | 122     | 21.52     |
| 3 | 52.00 | 118     | 20.81     | 6 | 57.00 | 126     | 22.22     | 9 | 64.00 | 118     | 20.81     |

**Figure S15. Mass Spectra of compound 4.**

03-Sep-14 17:42:34

**Cairo University  
Micro Analytical Center**

**DI Analysis  
Shimadzu Qp-2010 Plus**

Sample Information  
 Analyzed by : Mai Younis  
 Analyzed : 03/09/2014 05:24:53  
 Sample Name : 2  
 Sample ID :  
 Customer Name : Dr.Radwan Saad - Medicine - Helwan  
 Data File : C:\GCMSsolution\Data\Project1\2.QGD  
 Org Data File : C:\GCMSsolution\Data\Project1\2.QGD  
 Method File : C:\GCMSsolution\Data\Project1\A.GABR.qgm  
 Org Method File : C:\GCMSsolution\Data\Project1\A.GABR.qgm  
 Report File :  
 Tuning File : C:\GCMSsolution\System\Tune1\\_default1.qgt  
 \$Endl\$Modified by : Mai Younis  
 Modified : 03/09/2014 05:28:50

Method  
 Analytical Line 1  
 IonSourceTemp : 250.00 °C  
 [MS Table]  
 -Group 1 - Event 1--  
 Start Time : 0.00min  
 End Time : 10.00min  
 Scan :  
 ACQ Mode :  
 Event Time : 0.50sec  
 Scan Speed : 1428  
 Start m/z : 50.00  
 End m/z : 700.00  
 Electron Voltage : 70 eV  
 Ionization Mode : EI

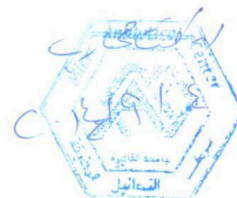

C:\GCMSsolution\Data\Project1\2.QGD

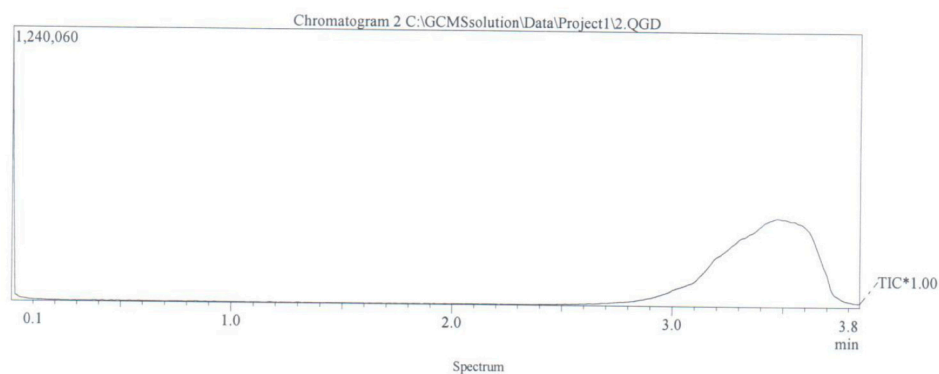

Line#:1 R.Time:3.5(Scan#:418)  
 MassPeaks:212  
 RawMode:Single 3.5(418) BasePeak:90(29231)  
 BG Mode:None Group 1 - Event 1

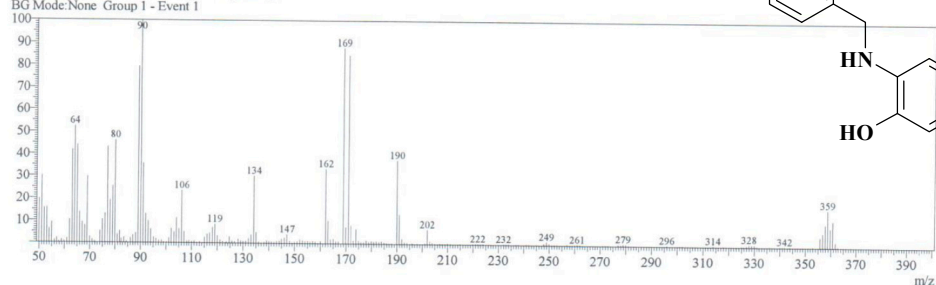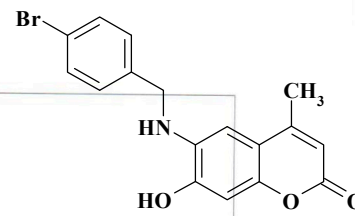

## Mass Table

Line#:1 R.Time:3.5(Scan#:418)

MassPeaks:212

RawMode:Single 3.5(418) BasePeak:90(29231)

BG Mode:None Group 1 - Event 1

| # | m/z   | Abs. In | Rel. Int. | # | m/z   | Abs. In | Rel. Int. | # | m/z   | Abs. In | Rel. Int. |
|---|-------|---------|-----------|---|-------|---------|-----------|---|-------|---------|-----------|
| 1 | 49.95 | 5753    | 19.68     | 4 | 52.95 | 4649    | 15.90     | 7 | 56.00 | 412     | 1.41      |
| 2 | 50.95 | 8804    | 30.12     | 5 | 53.95 | 1878    | 6.42      | 8 | 57.00 | 650     | 2.22      |
| 3 | 51.95 | 4586    | 15.69     | 6 | 54.95 | 2699    | 9.23      | 9 | 57.80 | 151     | 0.52      |

**Figure S16. Mass Spectra of compound 5.**



03-Sep-14 17:40:57

**Cairo University  
Micro Analytical Center**

**DI Analysis  
Shimadzu Qp-2010 Plus**

Sample Information  
 Analyzed by : Mai Younis  
 Analyzed : 03/09/2014 05:18:57  
 Sample Name : 1  
 Sample ID :  
 Customer Name : Dr.Radwan Saad - Medicine - Helwan  
 Data File : C:\GCMSsolution\Data\Project1\1.QGD  
 Org Data File : C:\GCMSsolution\Data\Project1\1.QGD  
 Method File : C:\GCMSsolution\Data\Project1\A.GABR.qgm  
 Org Method File : C:\GCMSsolution\Data\Project1\A.GABR.qgm  
 Report File :  
 Tuning File : C:\GCMSsolution\System\Tune1\default1.qgt  
 SEndIfModified by : Mai Younis  
 Modified : 03/09/2014 05:23:27

Method  
 Analytical Line 1  
 IonSourceTemp :250.00 °C  
 [MS Table]  
 --Group 1 - Event 1--  
 Start Time :0.00min  
 End Time :10.00min  
 ACQ Mode :Scan  
 Event Time :0.50sec  
 Scan Speed :1428  
 Start m/z :50.00  
 End m/z :700.00  
 Electron Voltage :70 eV  
 Ionization Mode :EI

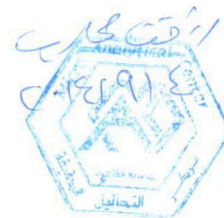

C:\GCMSsolution\Data\Project1\1.QGD

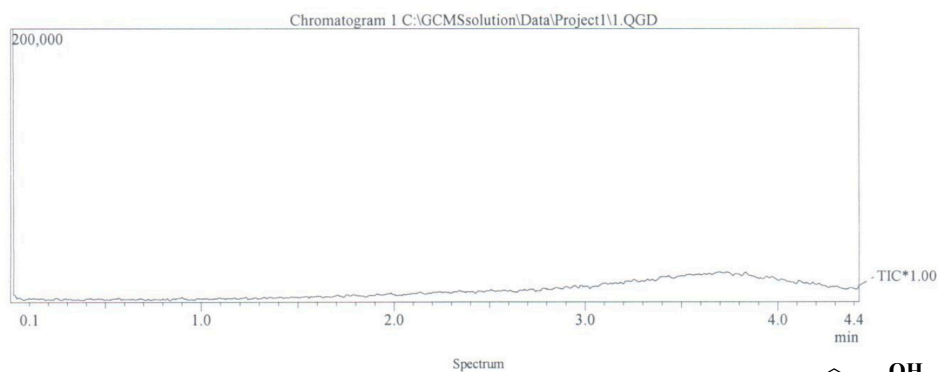

Line#:1 R.Time:3.7(Scan#:440)  
 MassPeaks:88  
 RawMode:Single 3.7(440) BasePeak:191(1418)  
 BG Mode:None Group 1 - Event 1

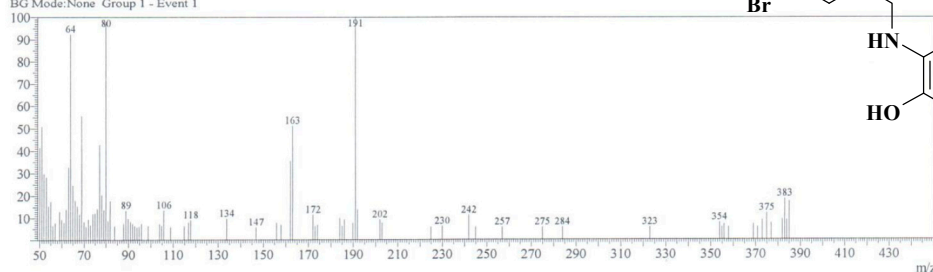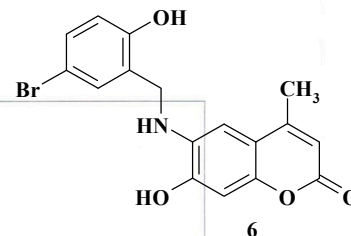

## Mass Table

Line#:1 R.Time:3.7(Scan#:440)

MassPeaks:88

RawMode:Single 3.7(440) BasePeak:191(1418)

BG Mode:None Group 1 - Event 1

| # | m/z   | Abs. In | Rel. Int. | # | m/z   | Abs. In | Rel. Int. |
|---|-------|---------|-----------|---|-------|---------|-----------|
| 1 | 49.95 | 589     | 41.54     | 4 | 52.90 | 401     | 28.28     |
| 2 | 50.95 | 723     | 50.99     | 5 | 53.90 | 220     | 15.51     |
| 3 | 51.90 | 423     | 29.83     | 6 | 54.90 | 246     | 17.35     |
|   |       |         |           | 7 | 55.90 | 92      | 6.49      |
|   |       |         |           | 8 | 56.90 | 111     | 7.83      |
|   |       |         |           | 9 | 58.90 | 185     | 13.05     |

**Figure S 17. Mass Spectra of compound 6.**

03-Sep-14 17:44:33

**Cairo University  
Micro Analytical Center**

**DI Analysis  
Shimadzu Qp-2010 Plus**

Sample Information  
 Analyzed by : Mai Younis  
 Analyzed : 03/09/2014 05:30:49  
 Sample Name : 3  
 Sample ID :  
 Customer Name : Dr.Radwan Saad - Medicine - Helwan  
 Data File : C:\GCMSsolution\Data\Project1\3.QGD  
 Org Data File : C:\GCMSsolution\Data\Project1\3.QGD  
 Method File : C:\GCMSsolution\Data\Project1\A.GABR.qgm  
 Org Method File : C:\GCMSsolution\Data\Project1\A.GABR.qgm  
 Report File :  
 Tuning File : C:\GCMSsolution\System\Tune1\\_default1.qgt  
 \$EndIf\$Modified by : Mai Younis  
 Modified : 03/09/2014 05:34:28

Method  
 Analytical Line 1  
 IonSourceTemp : 250.00 °C  
 [MS Table]  
 -Group 1 - Event 1-  
 Start Time : 0.00min  
 End Time : 10.00min  
 Scan : Scan  
 ACQ Mode :  
 Event Time : 0.50sec  
 Scan Speed : 1428  
 Start m/z : 50.00  
 End m/z : 700.00  
 Electron Voltage : 70 eV  
 Ionization Mode : EI

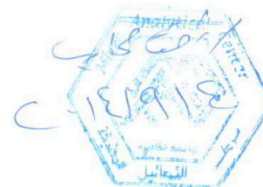

C:\GCMSsolution\Data\Project1\3.QGD

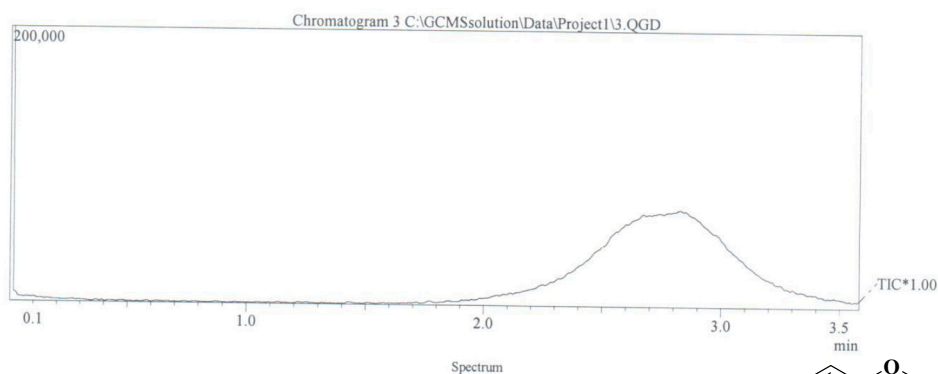

Line#:1 R.Time:2.8(Scan#:338)  
 MassPeaks:108  
 RawMode:Single 2.8(338) BasePeak:199(3345)  
 BG Mode:None Group 1 - Event 1

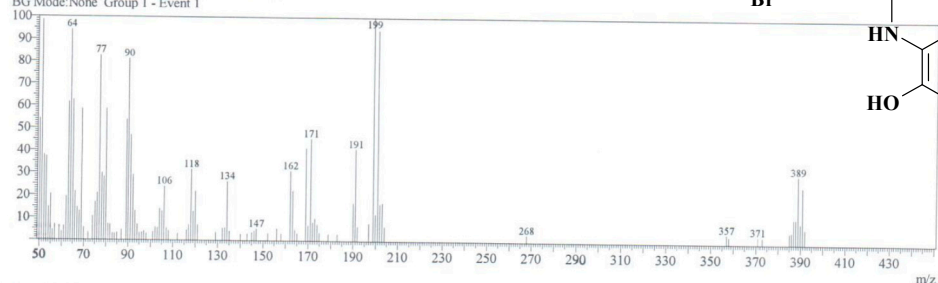

Line#:1 R.Time:2.8(Scan#:338)  
 MassPeaks:108  
 RawMode:Single 2.8(338) BasePeak:199(3345)  
 BG Mode:None Group 1 - Event 1

| # | m/z   | Abs. In | Rel. Int. | # | m/z   | Abs. In | Rel. Int. |
|---|-------|---------|-----------|---|-------|---------|-----------|
| 1 | 49.95 | 1811    | 54.14     | 4 | 52.95 | 1244    | 37.19     |
| 2 | 50.95 | 3296    | 98.54     | 5 | 53.95 | 494     | 14.77     |
| 3 | 52.00 | 1270    | 37.97     | 6 | 54.95 | 682     | 20.39     |
|   |       |         |           | 7 | 55.90 | 150     | 4.48      |
|   |       |         |           | 8 | 56.90 | 231     | 6.91      |
|   |       |         |           | 9 | 58.90 | 215     | 6.43      |

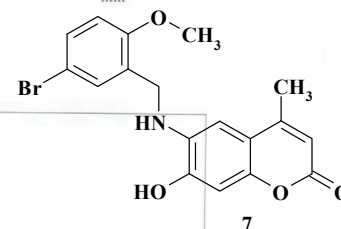

**Figure S18.** Mass Spectra of compound 7.

12-Oct-14 20:51:08

**Cairo University  
Micro Analytical Center**

**DI Analysis  
Shimadzu Qp-2010 Plus**

Sample Information  
 Analyzed by : A.GABR  
 Analyzed : 12/10/2014 08:44:51 م  
 Sample Name : 11  
 Sample ID :  
 Customer Name : رهوان الحجاز - صينيله حلوان  
 Data File : C:\GCMSsolution\Data\Project1\11.QGD  
 Org. Data File : C:\GCMSsolution\Data\Project1\11.QGD  
 Method File : C:\GCMSsolution\Data\Project1\A.GABR.qgm  
 Org. Method File : C:\GCMSsolution\Data\Project1\A.GABR.qgm  
 Report File :  
 Tuning File : C:\GCMSsolution\System\Tune1\default1.qgt  
 SEndIRModified by : A.GABR  
 Modified : 12/10/2014 08:49:59 م

Method  
 Analytical Line 1  
 IonSourceTemp :250.00 °C  
 [MS Table]  
 -Group 1 - Event 1-  
 Start Time :0.00min  
 End Time :10.00min  
 ACQ Mode :Scan  
 Event Time :0.50sec  
 Scan Speed :769  
 Start m/z :50.00  
 End m/z :400.00  
 Electron Voltage :70 eV  
 Ionization Mode :EI

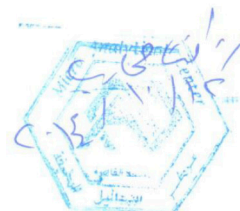

C:\GCMSsolution\Data\Project1\11.QGD

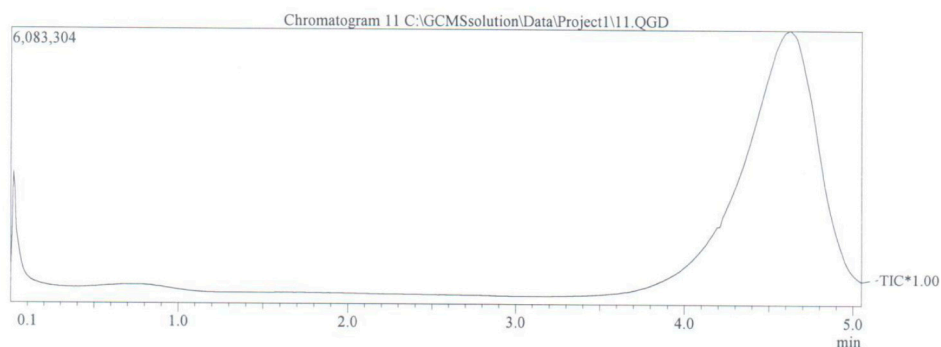

Line#:1 R.Time:5.0(Scan#:607)  
 MassPeaks:280  
 RawMode:Single 5.0(607) BasePeak:137(52372)  
 BG Mode:None Group 1 - Event 1

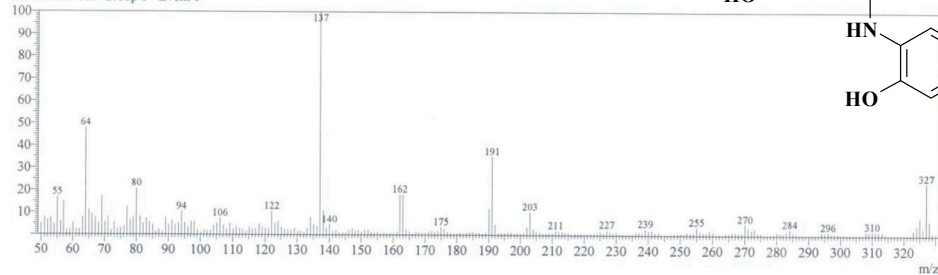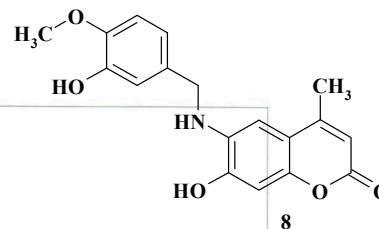

## Mass Table

Line#:1 R.Time:5.0(Scan#:607)

MassPeaks:280

RawMode:Single 5.0(607) BasePeak:137(52372)

BG Mode:None Group 1 - Event 1

| # | m/z   | Abs. In | Rel. Int. | # | m/z   | Abs. In | Rel. Int. | # | m/z   | Abs. In | Rel. Int. |
|---|-------|---------|-----------|---|-------|---------|-----------|---|-------|---------|-----------|
| 1 | 50.00 | 2620    | 5.00      | 4 | 53.05 | 3988    | 7.61      | 7 | 56.10 | 3070    | 5.86      |
| 2 | 51.05 | 4146    | 7.92      | 5 | 54.10 | 2430    | 4.64      | 8 | 57.10 | 7852    | 14.99     |
| 3 | 52.05 | 3405    | 6.50      | 6 | 55.05 | 8831    | 16.86     | 9 | 58.10 | 1050    | 2.00      |

1 / 3

**Figure S19. Mass Spectra of compound 8.**

12-Oct-14 20:10:10

**Cairo University  
Micro Analytical Center**

**DI Analysis  
Shimadzu Qp-2010 Plus**

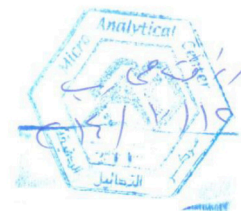

Sample Information  
 Analyzed by : A.GABR  
 Analyzed : 12/10/2014 08:03:12 م  
 Sample Name : 7  
 Sample ID :  
 Customer Name : رحوان الحجر - صينله حوان  
 Data File : C:\GCMSsolution\Data\Project1\7.QGD  
 Org Data File : C:\GCMSsolution\Data\Project1\7.QGD  
 Method File : C:\GCMSsolution\Data\Project1\A.GABR.qgm  
 Org Method File : C:\GCMSsolution\Data\Project1\A.GABR.qgm  
 Report File :  
 Tuning File : C:\GCMSsolution\System\Tune1\\_default1.qgt  
 SEndIfSModified by : A.GABR  
 Modified : 12/10/2014 08:07:07 م

Method  
 Analytical Line 1  
 IonSourceTemp :250.00 °C  
 [MS Table]  
 -Group 1 - Event 1-  
 Start Time :0.00min  
 End Time :10.00min  
 ACQ Mode :Scan  
 Event Time :0.50sec  
 Scan Speed :769  
 Start m/z :50.00  
 End m/z :400.00  
 Electron Voltage :70 eV  
 Ionization Mode :EI

C:\GCMSsolution\Data\Project1\7.QGD

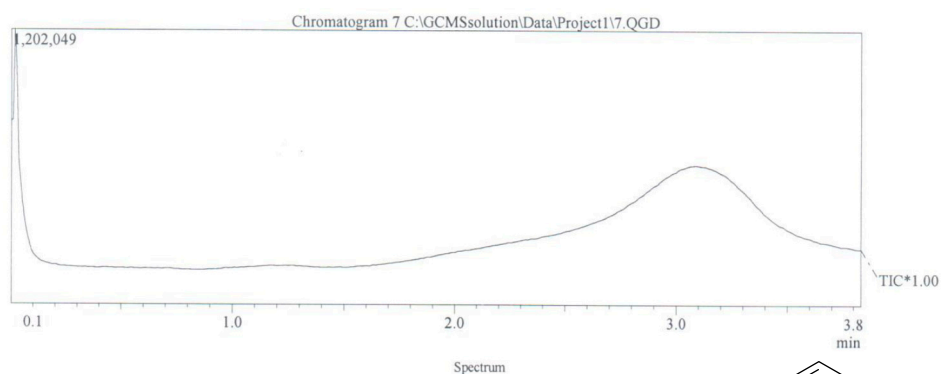

Line#:1 R.Time:2.2(Scan#:269)  
 MassPeaks:119  
 RawMode:Single 2.2(269) BasePeak:148(339)  
 BG Mode:2.3(273) Group 1 - Event 1

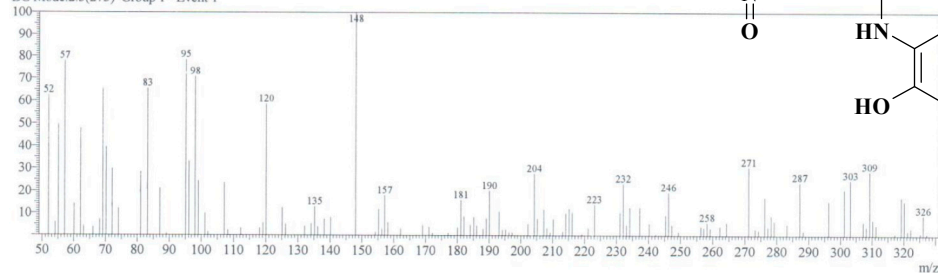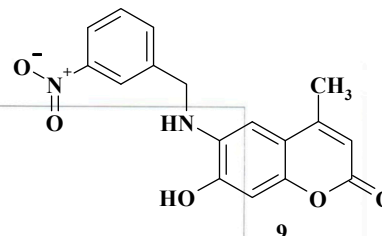

## Mass Table

Line#:1 R.Time:2.2(Scan#:269)

MassPeaks:119

RawMode:Single 2.2(269) BasePeak:148(339)

BG Mode:2.3(273) Group 1 - Event 1

| # | m/z   | Abs. In | Rel. Int. | # | m/z   | Abs. In | Rel. Int. | # | m/z   | Abs. In | Rel. Int. |
|---|-------|---------|-----------|---|-------|---------|-----------|---|-------|---------|-----------|
| 1 | 52.00 | 212     | 62.54     | 4 | 57.10 | 264     | 77.88     | 7 | 63.05 | 14      | 4.13      |
| 2 | 54.10 | 20      | 5.90      | 5 | 60.05 | 48      | 14.16     | 8 | 66.05 | 12      | 3.54      |
| 3 | 55.10 | 168     | 49.56     | 6 | 62.10 | 162     | 47.79     | 9 | 68.10 | 24      | 7.08      |

1 / 2

**Figure S20. Mass Spectra of compound 9.**

12-Oct-14 20:32:11

**Cairo University  
Micro Analytical Center**

**DI Analysis  
Shimadzu Qp-2010 Plus**

Sample Information  
 Analyzed by : A.GABR  
 Analyzed : 12/10/2014 08:25:27 م  
 Sample Name : 9  
 Sample ID :  
 Customer Name : رضوان الحجاز - صنبيله حلوان  
 Data File : C:\GCMSsolution\Data\Project1\9.QGD  
 Org Data File : C:\GCMSsolution\Data\Project1\9.QGD  
 Method File : C:\GCMSsolution\Data\Project1\A.GABR.qgm  
 Org Method File : C:\GCMSsolution\Data\Project1\A.GABR.qgm  
 Report File :  
 Tuning File : C:\GCMSsolution\System\Tune1\\_default1.qgt  
 SEndIfSModified by : A.GABR  
 Modified : 12/10/2014 08:30:02 م

Method  
 Analytical Line 1  
 IonSourceTemp :250.00 °C  
 [MS Table]  
 --Group 1 - Event 1--  
 Start Time :0.00min  
 End Time :10.00min  
 ACQ Mode :Scan  
 Event Time :0.50sec  
 Scan Speed :769  
 Start m/z :50.00  
 End m/z :400.00  
 Electron Voltage :70 eV  
 Ionization Mode :EI

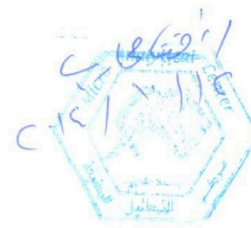

C:\GCMSsolution\Data\Project1\9.QGD

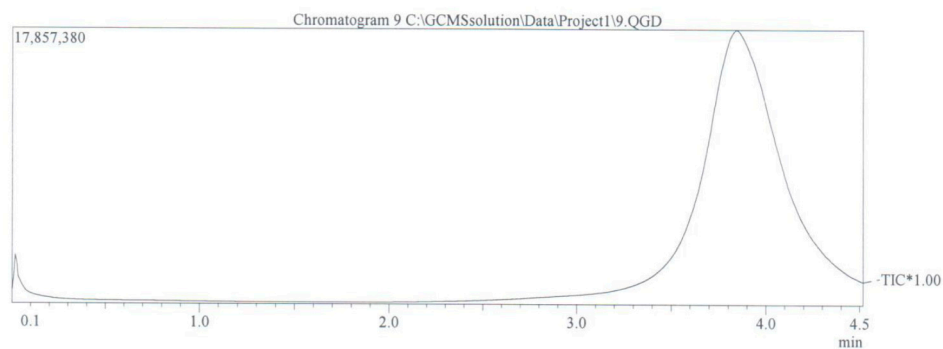

Line#:1 R.Time:4.3(Scan#:511)  
 MassPeaks:294  
 RawMode:Single 4.3(511) BasePeak:340(413426)  
 BG Mode:None Group 1 - Event 1

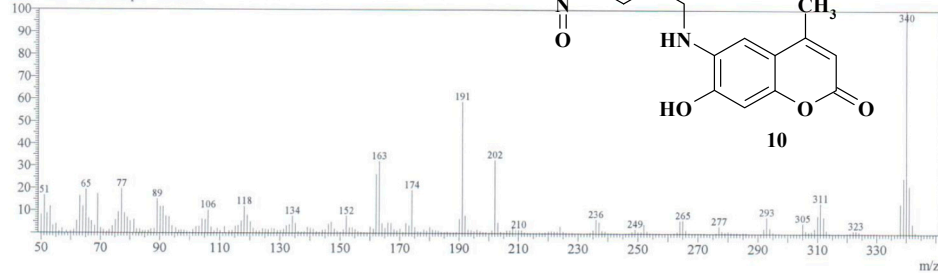

Mass Table

Line#:1 R.Time:4.3(Scan#:511)

MassPeaks:294

RawMode:Single 4.3(511) BasePeak:340(413426)

BG Mode:None Group 1 - Event 1

| # | m/z   | Abs. In | Rel. Int. | # | m/z   | Abs. In | Rel. Int. | # | m/z   | Abs. In | Rel. Int. |
|---|-------|---------|-----------|---|-------|---------|-----------|---|-------|---------|-----------|
| 1 | 50.05 | 33677   | 8.15      | 4 | 53.05 | 48503   | 11.73     | 7 | 56.10 | 3318    | 0.80      |
| 2 | 51.05 | 69041   | 16.70     | 5 | 54.00 | 13337   | 3.23      | 8 | 57.10 | 8351    | 2.02      |
| 3 | 52.05 | 35890   | 8.68      | 6 | 55.05 | 16286   | 3.94      | 9 | 58.60 | 4522    | 1.09      |

**Figure S21. Mass Spectra of compound 10.**

**Cairo University  
Micro Analytical Center**

**DI Analysis  
Shimadzu Qp-2010 Plus**

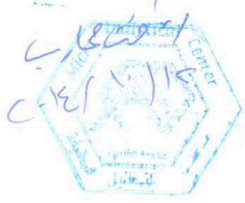

Sample Information  
 Analyzed by : A.GABR  
 Analyzed : 12/10/2014 08:12:17 م  
 Sample Name : 8  
 Sample ID :  
 Customer Name : رضوان الحجار - صينيله حلوان  
 Data File : C:\GCMSsolution\Data\Project1\8.QGD  
 Org Data File : C:\GCMSsolution\Data\Project1\8.QGD  
 Method File : C:\GCMSsolution\Data\Project1\A.GABR.qgm  
 Org Method File : C:\GCMSsolution\Data\Project1\A.GABR.qgm  
 Report File :  
 Tuning File : C:\GCMSsolution\System\Tune1\default1.qgt  
 SEndItS Modified by : A.GABR  
 Modified : 12/10/2014 08:18:34 م

Method  
 Analytical Line 1  
 IonSourceTemp :250.00 °C  
 [MS Table]  
 -Group 1 - Event 1-  
 Start Time :0.00min  
 End Time :10.00min  
 ACQ Mode :Scan  
 Event Time :0.50sec  
 Scan Speed :769  
 Start m/z :50.00  
 End m/z :400.00  
 Electron Voltage :70 eV  
 Ionization Mode :EI

C:\GCMSsolution\Data\Project1\8.QGD

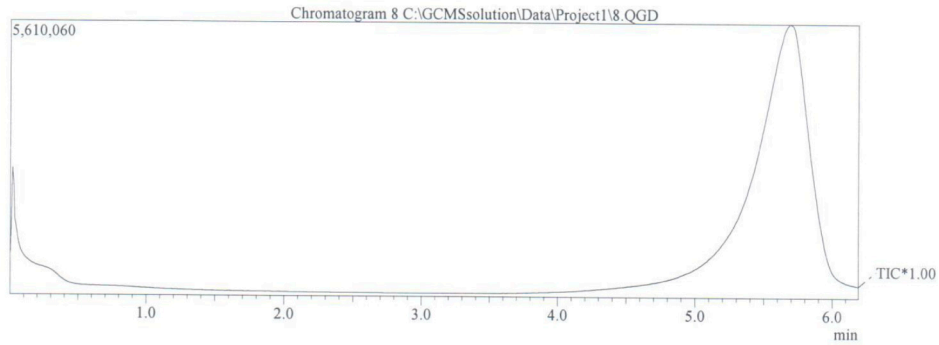

Line#:1 R.Time:4.3(Scan#:515)  
 MassPeaks:188  
 RawMode:Single 4.3(515) BasePeak:80(720)  
 BG Mode:4.2(510) Group 1 - Event 1

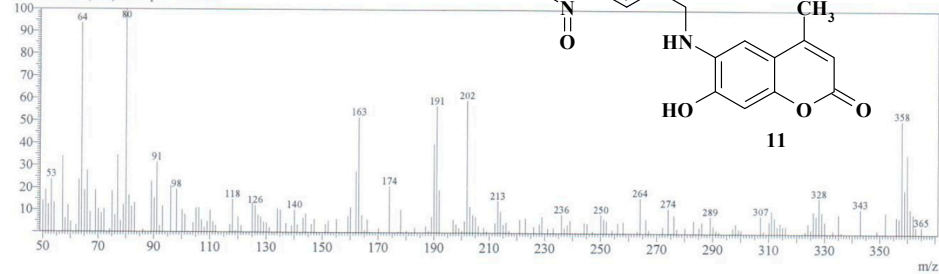

Mass Table  
 Line#:1 R.Time:4.3(Scan#:515)  
 MassPeaks:188  
 RawMode:Single 4.3(515) BasePeak:80(720)  
 BG Mode:4.2(510) Group 1 - Event 1

| # | m/z   | Abs. In | Rel. Int. | # | m/z   | Abs. In | Rel. Int. | # | m/z   | Abs. In | Rel. Int. |
|---|-------|---------|-----------|---|-------|---------|-----------|---|-------|---------|-----------|
| 1 | 50.00 | 102     | 14.17     | 4 | 53.05 | 171     | 23.75     | 7 | 58.05 | 44      | 6.11      |
| 2 | 51.05 | 137     | 19.03     | 5 | 54.10 | 96      | 13.33     | 8 | 59.05 | 86      | 11.94     |
| 3 | 52.00 | 89      | 12.36     | 6 | 57.10 | 245     | 34.03     | 9 | 60.05 | 33      | 4.58      |

**Figure S22. Mass Spectra of compound 11.**

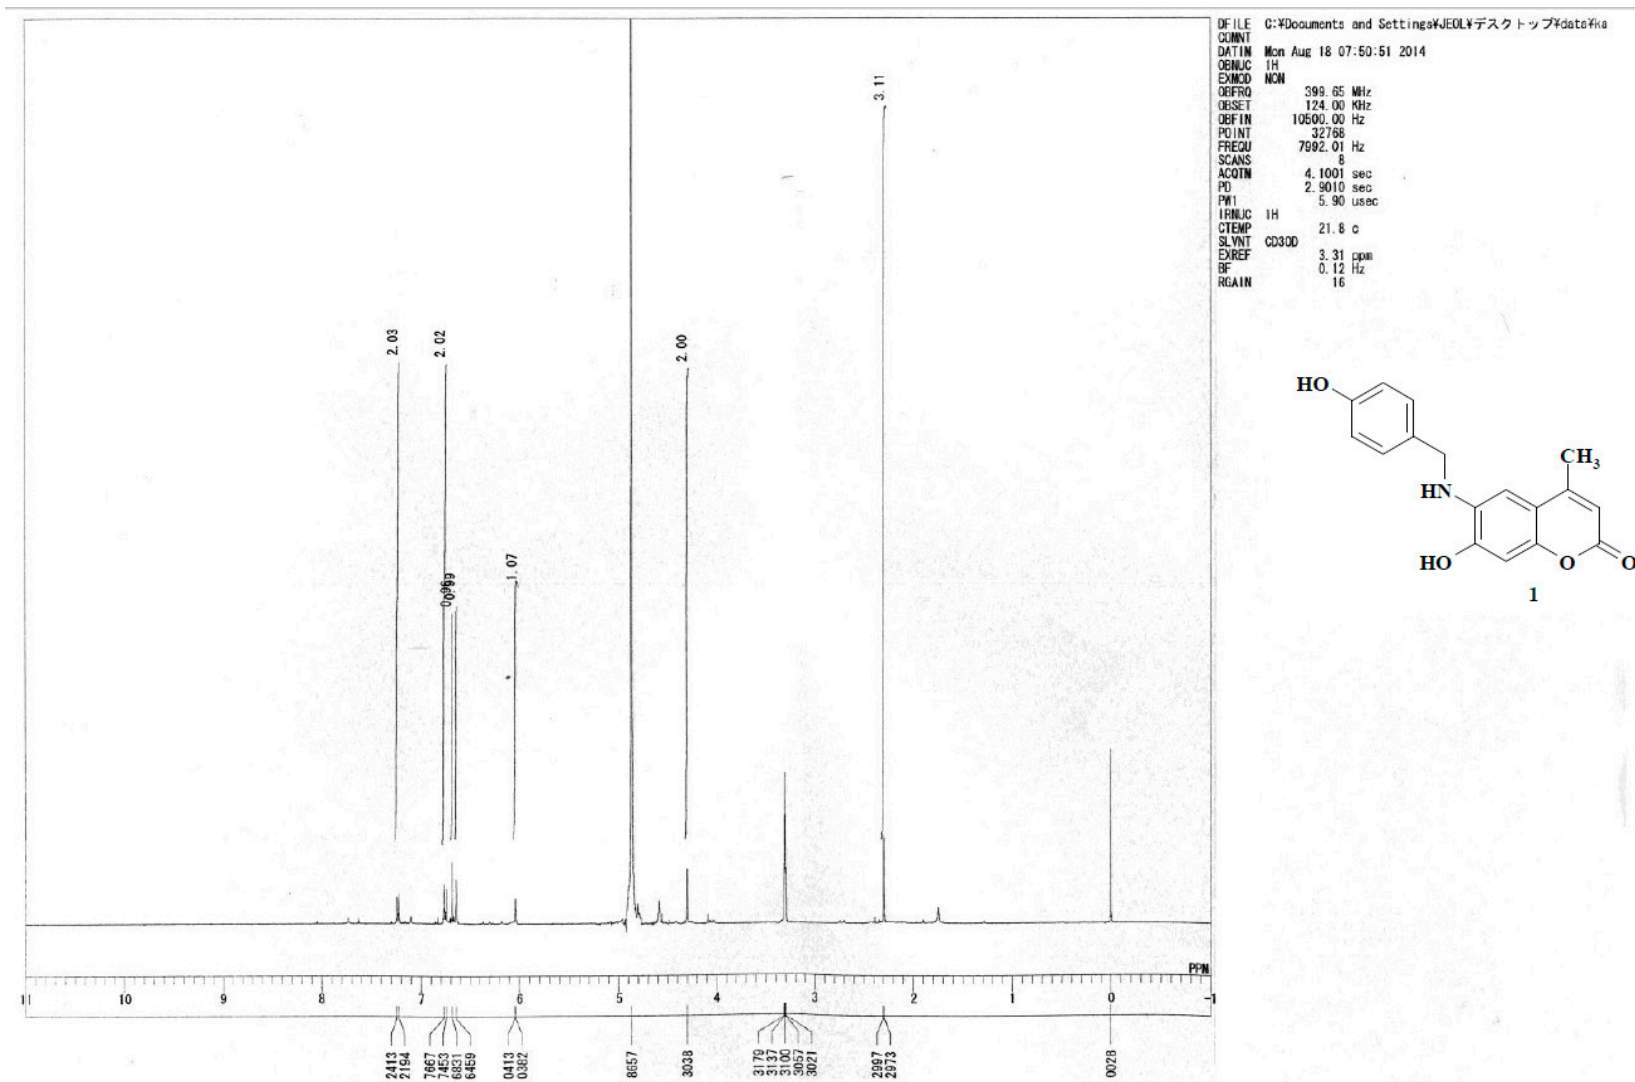Figure S23. <sup>1</sup>H-NMR of compound 1.

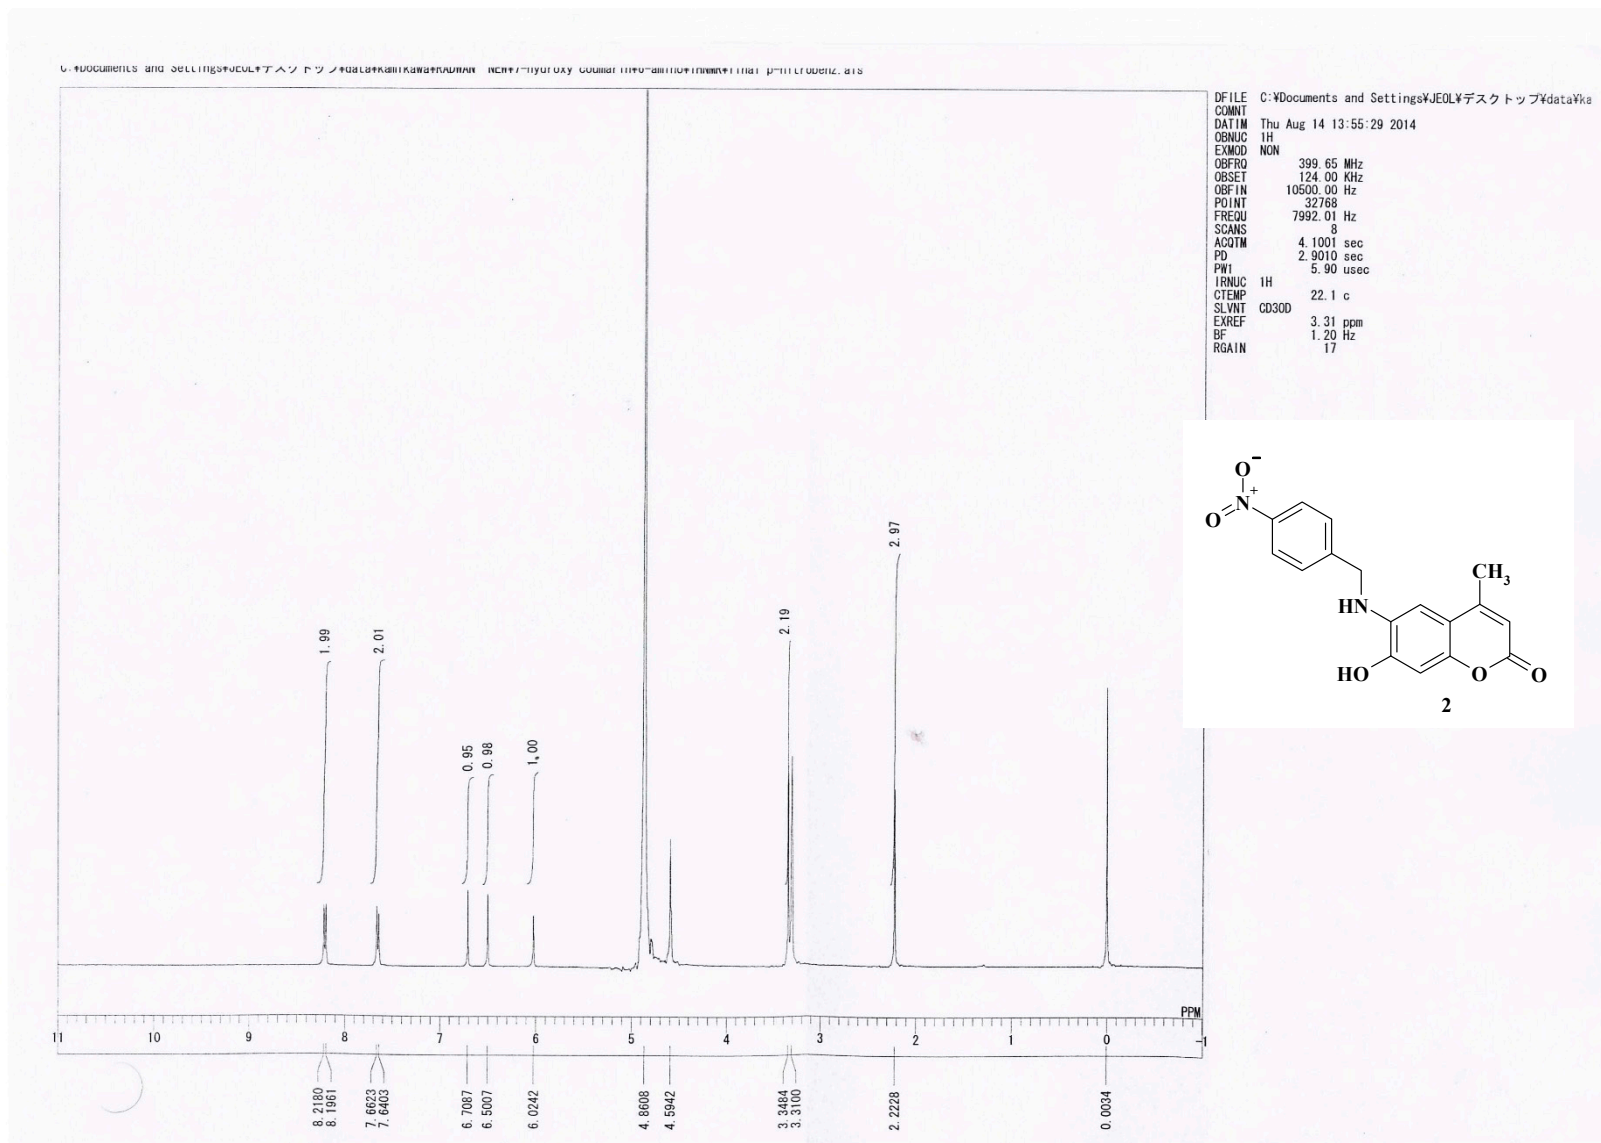Figure S24. <sup>1</sup>H-NMR of compound 2.



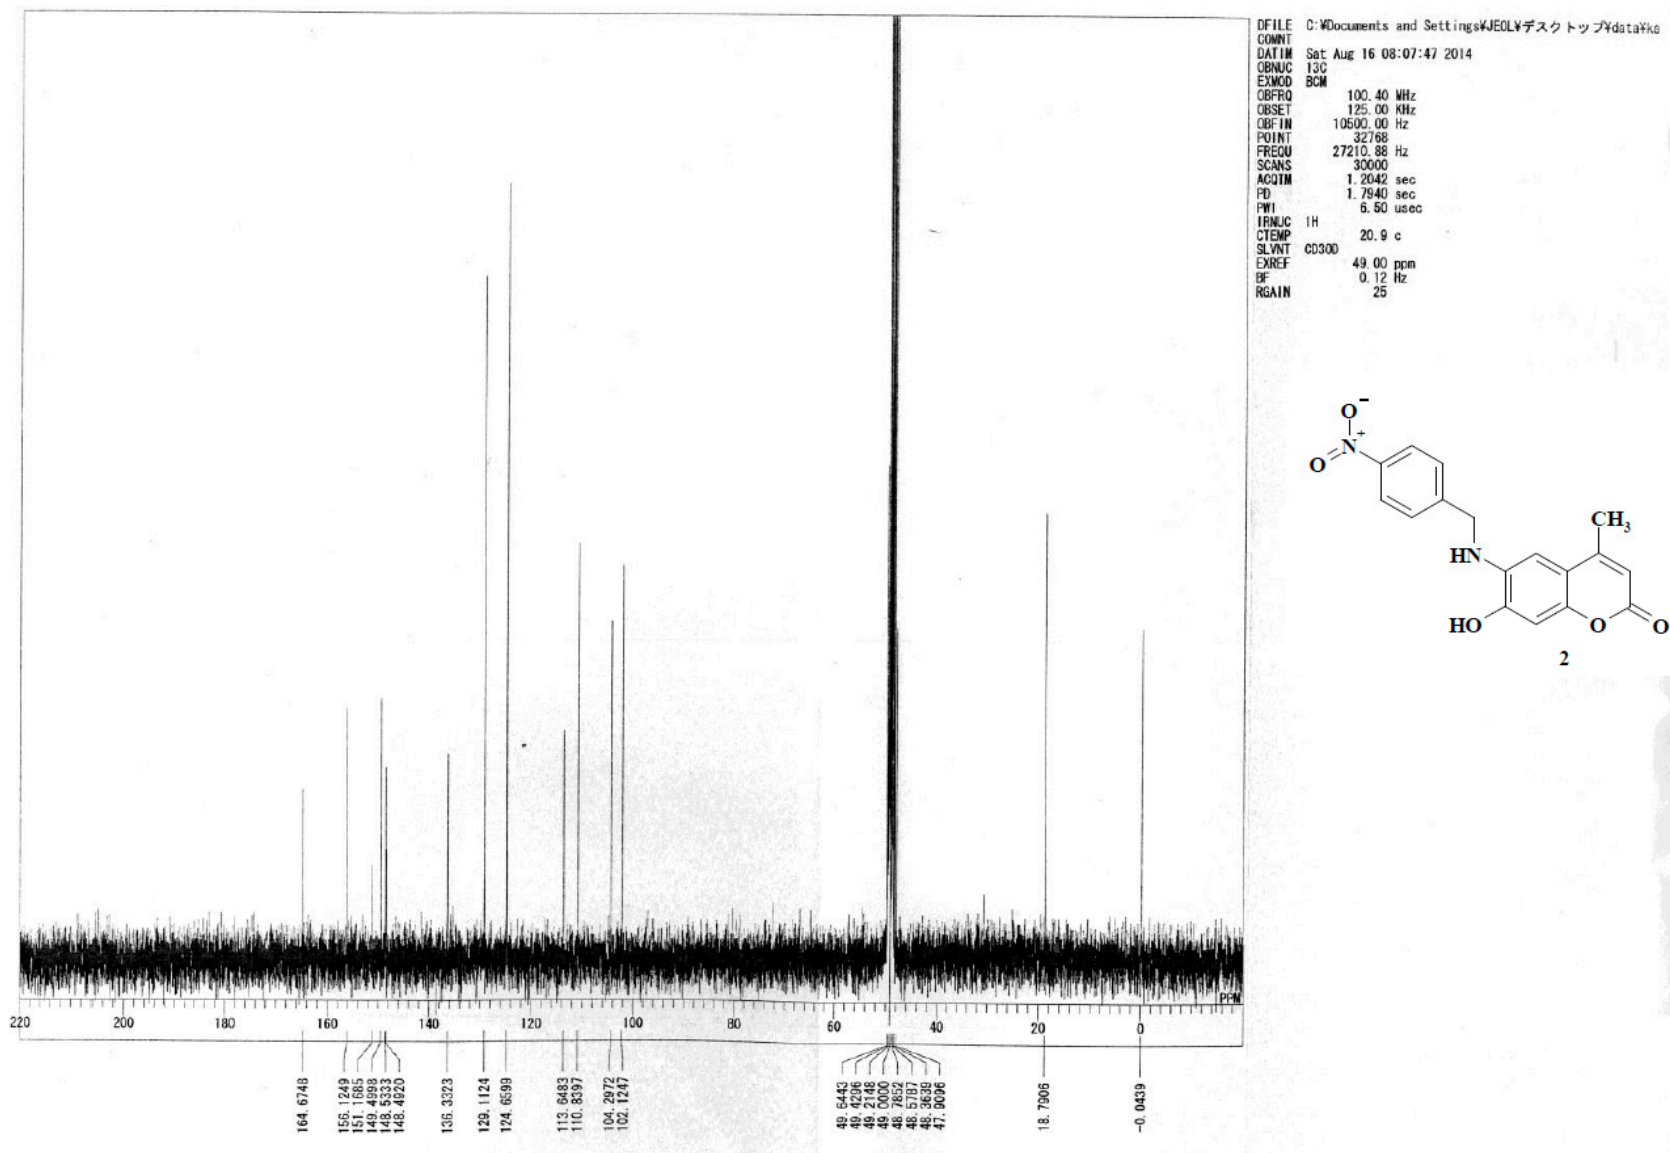Figure S25. <sup>13</sup>C-NMR of compound 2.

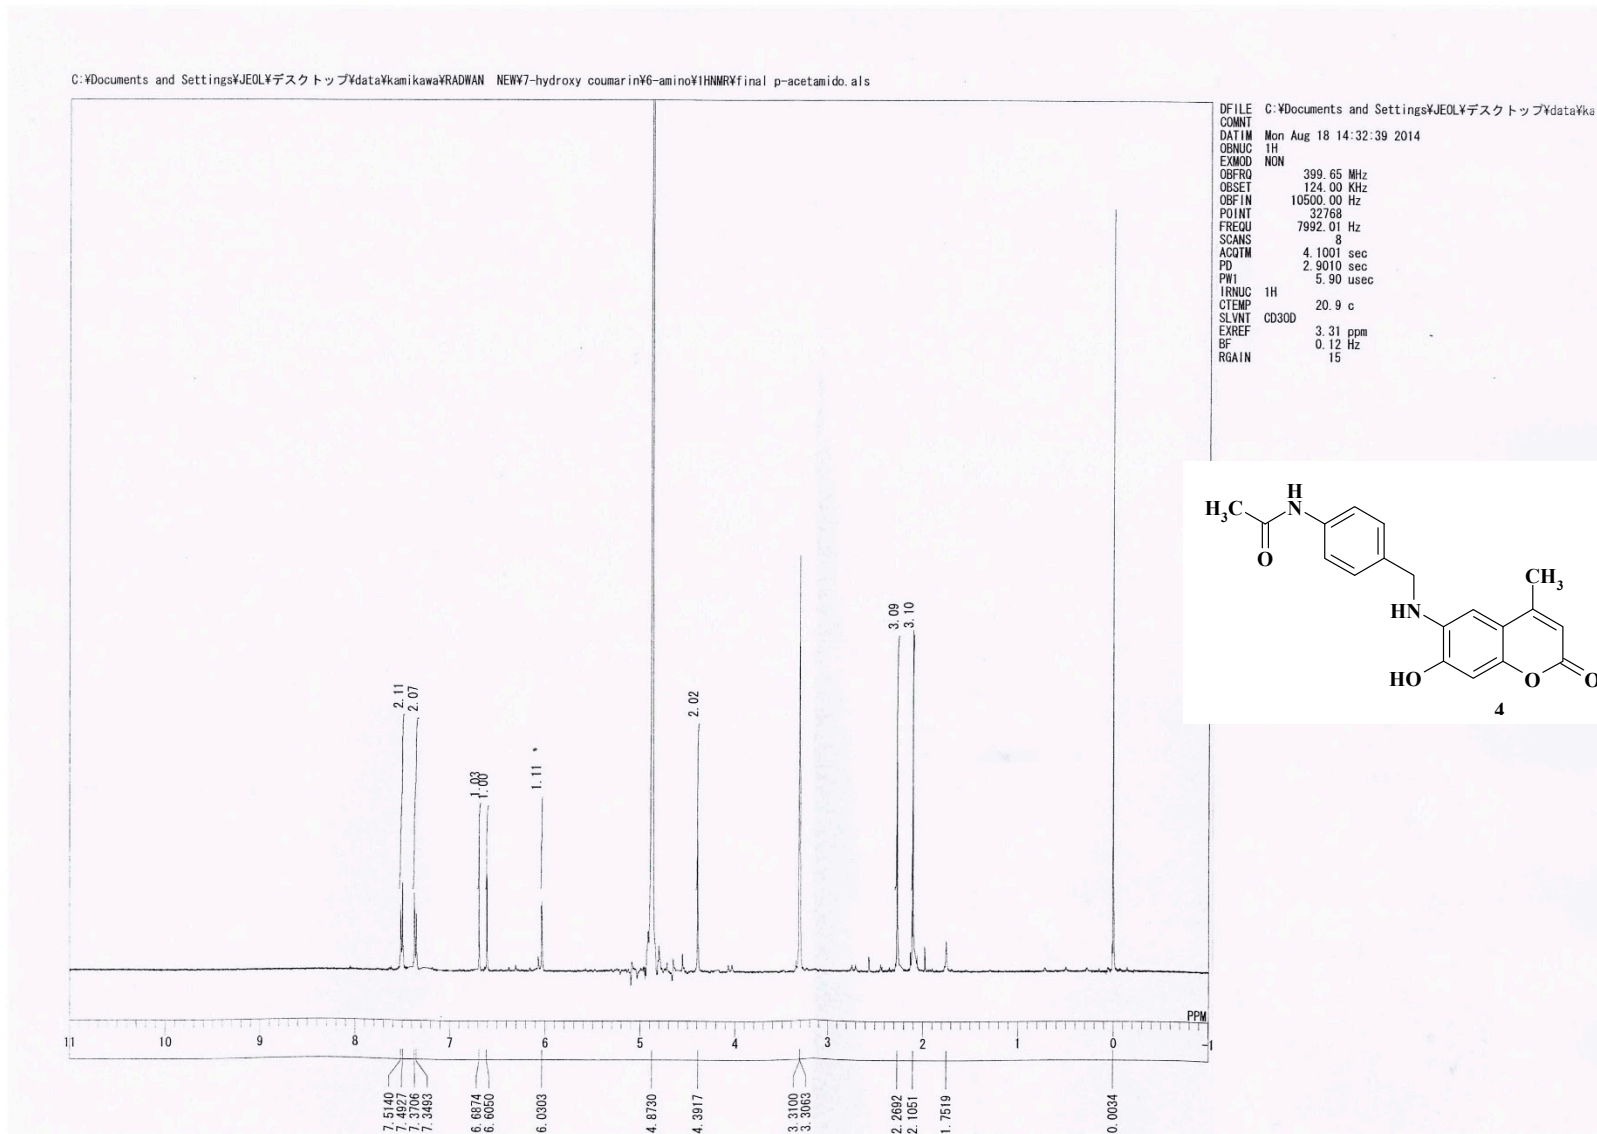

Figure S26. <sup>1</sup>H-NMR of compound 4.

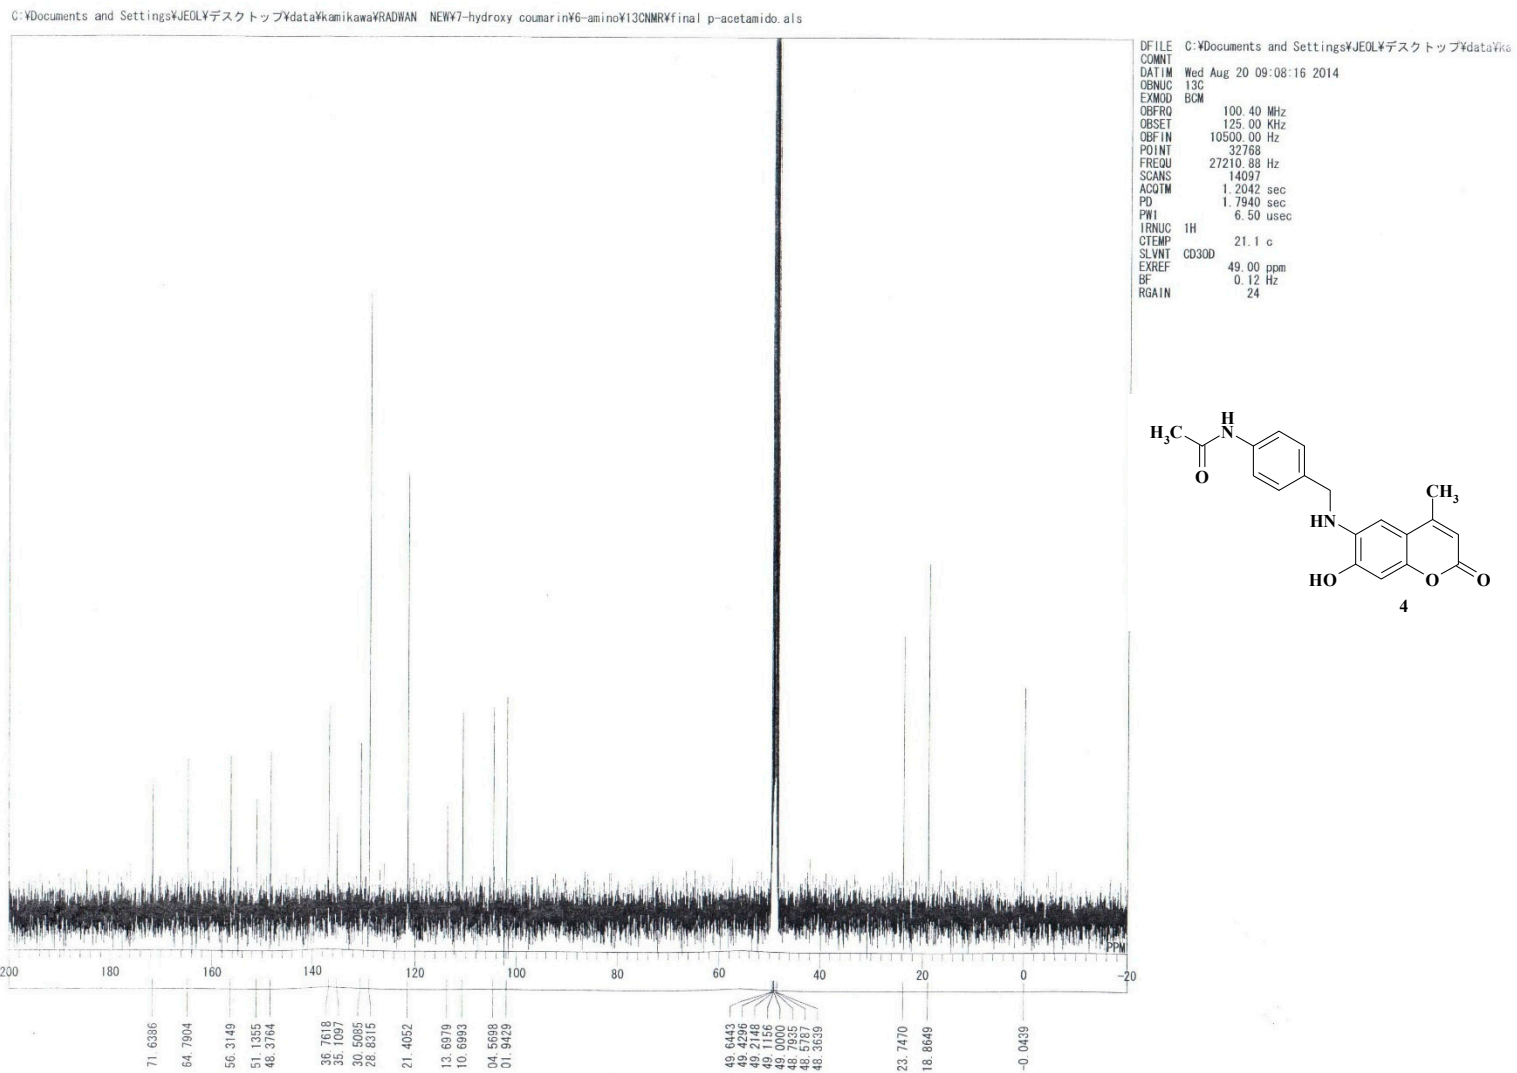Figure S27.  $^{13}\text{C}$ -NMR of compound 4.

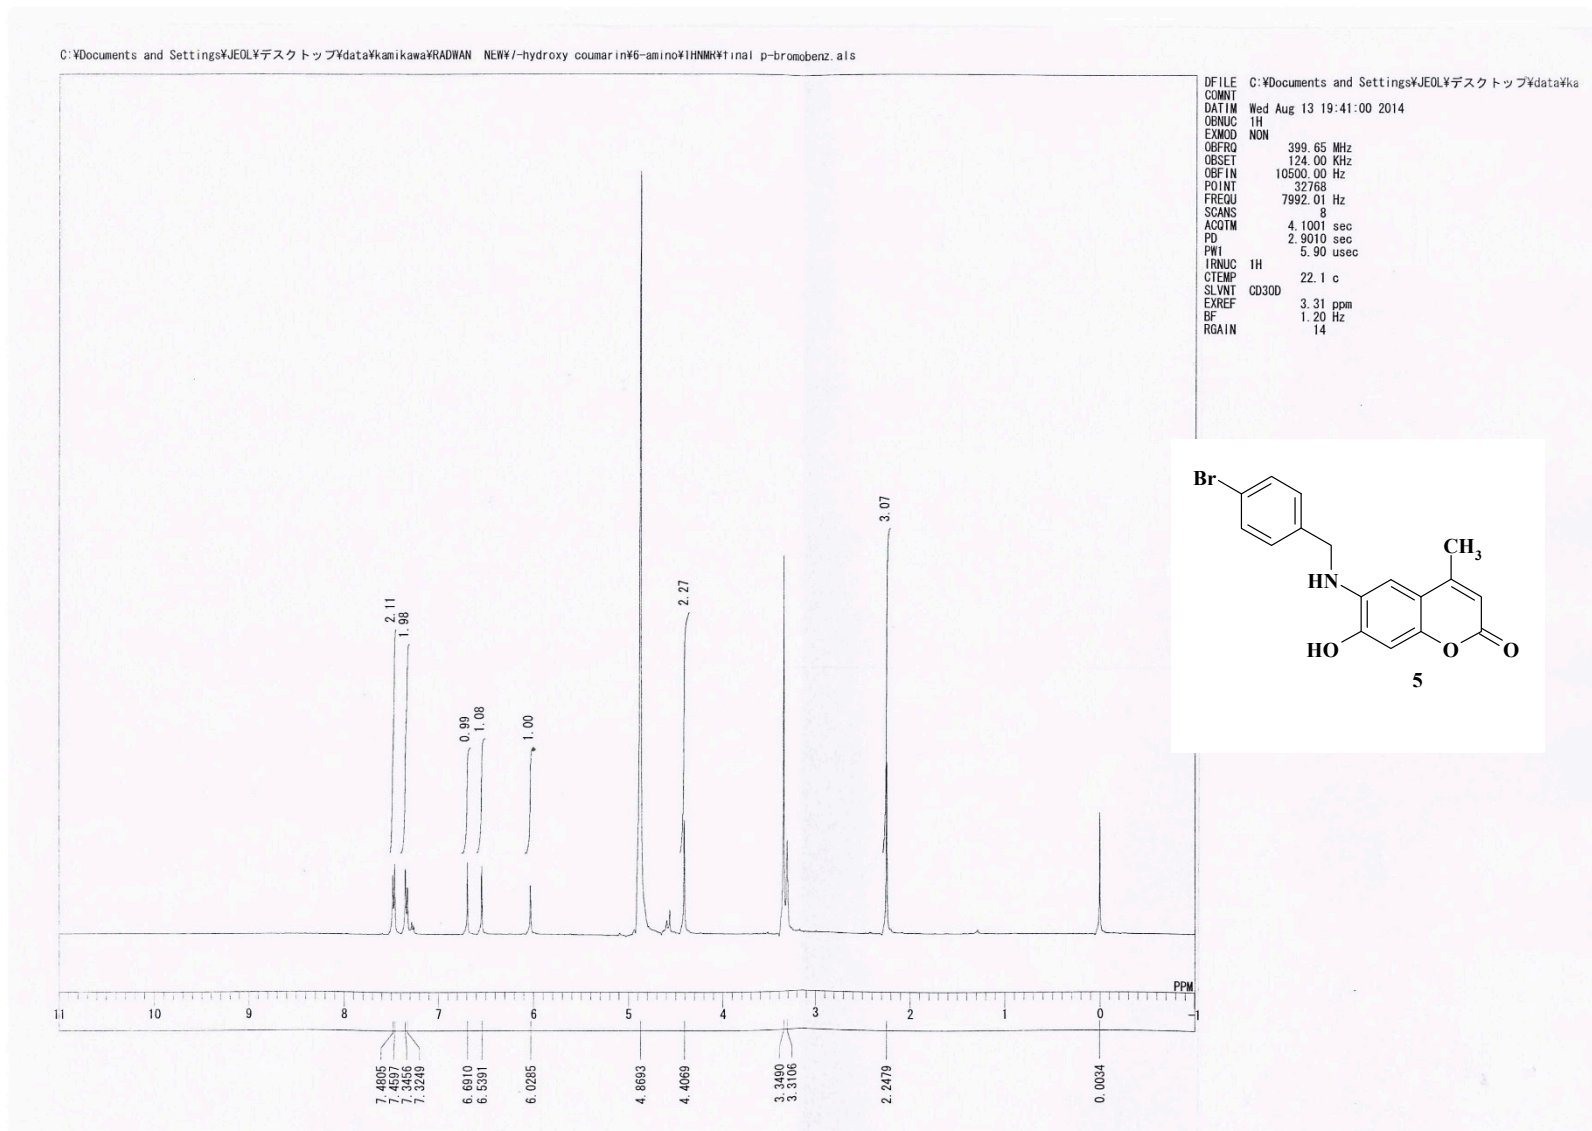

Figure S28. <sup>1</sup>H-NMR of compound 5.

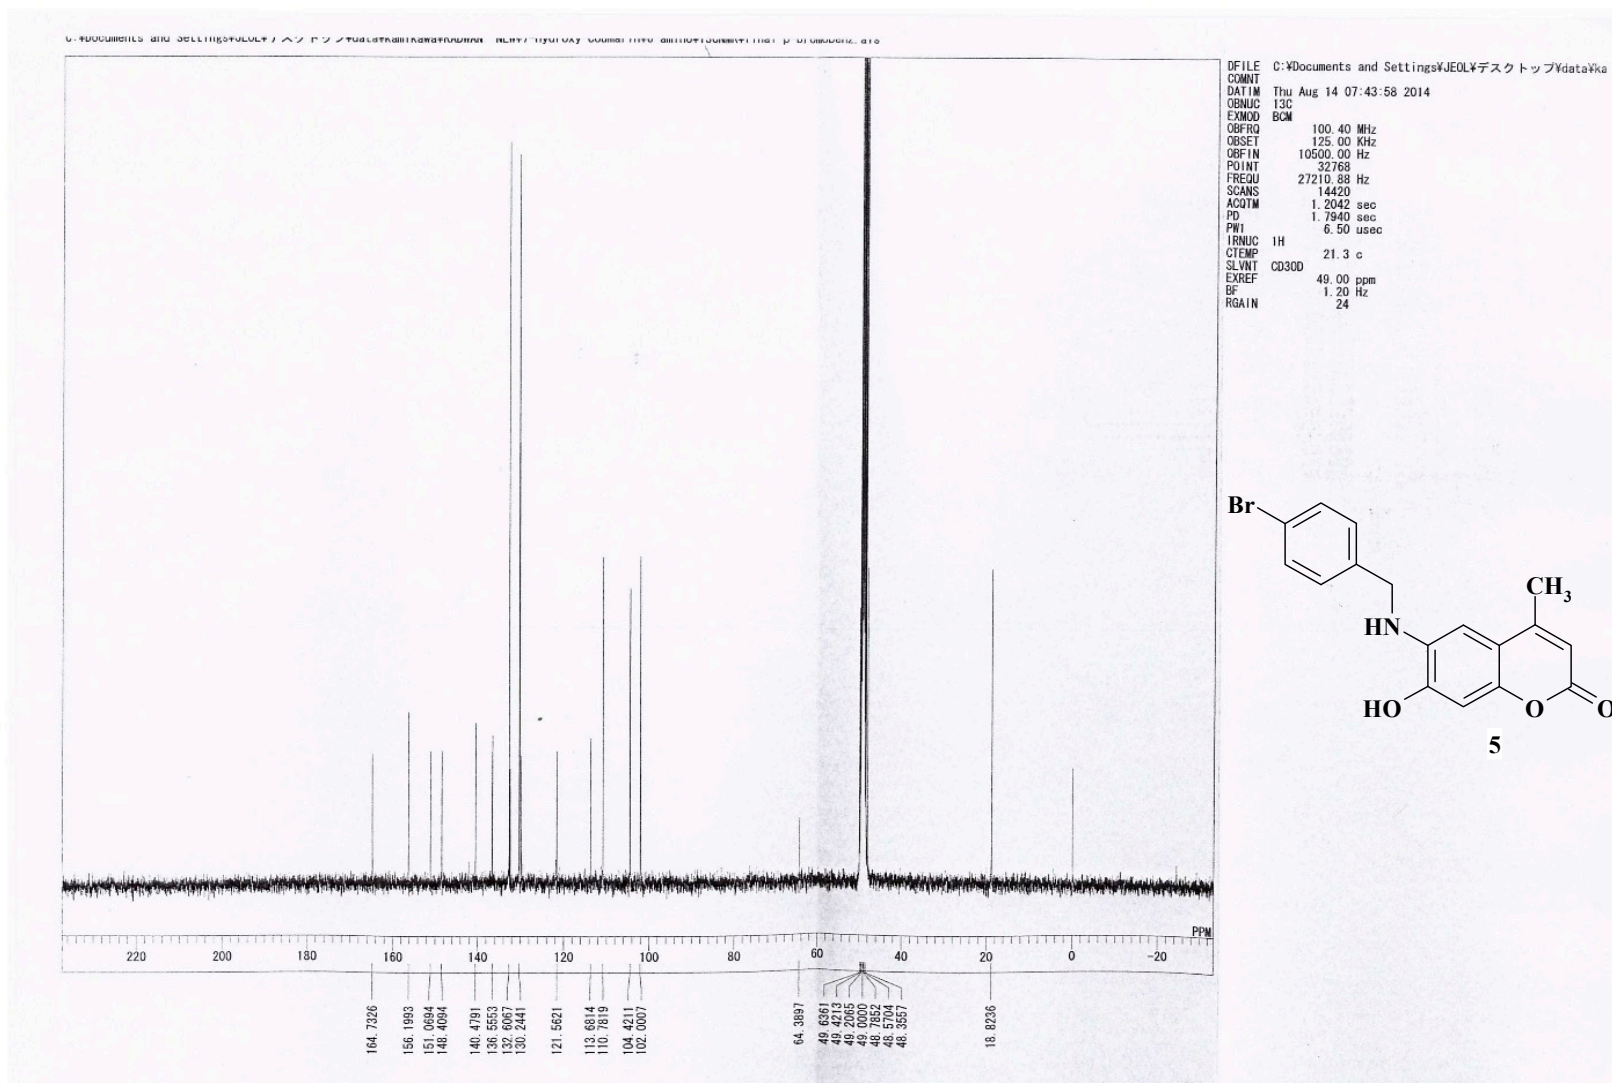

Figure S29. <sup>13</sup>C-NMR of compound 5.

C:\Documents and Settings\JEOL\Desktop\data\kamikawa\RADWAN NEW7-hydroxy coumarin\6-amino\1HMRVfinal 5-Br-2-hydroxy.als

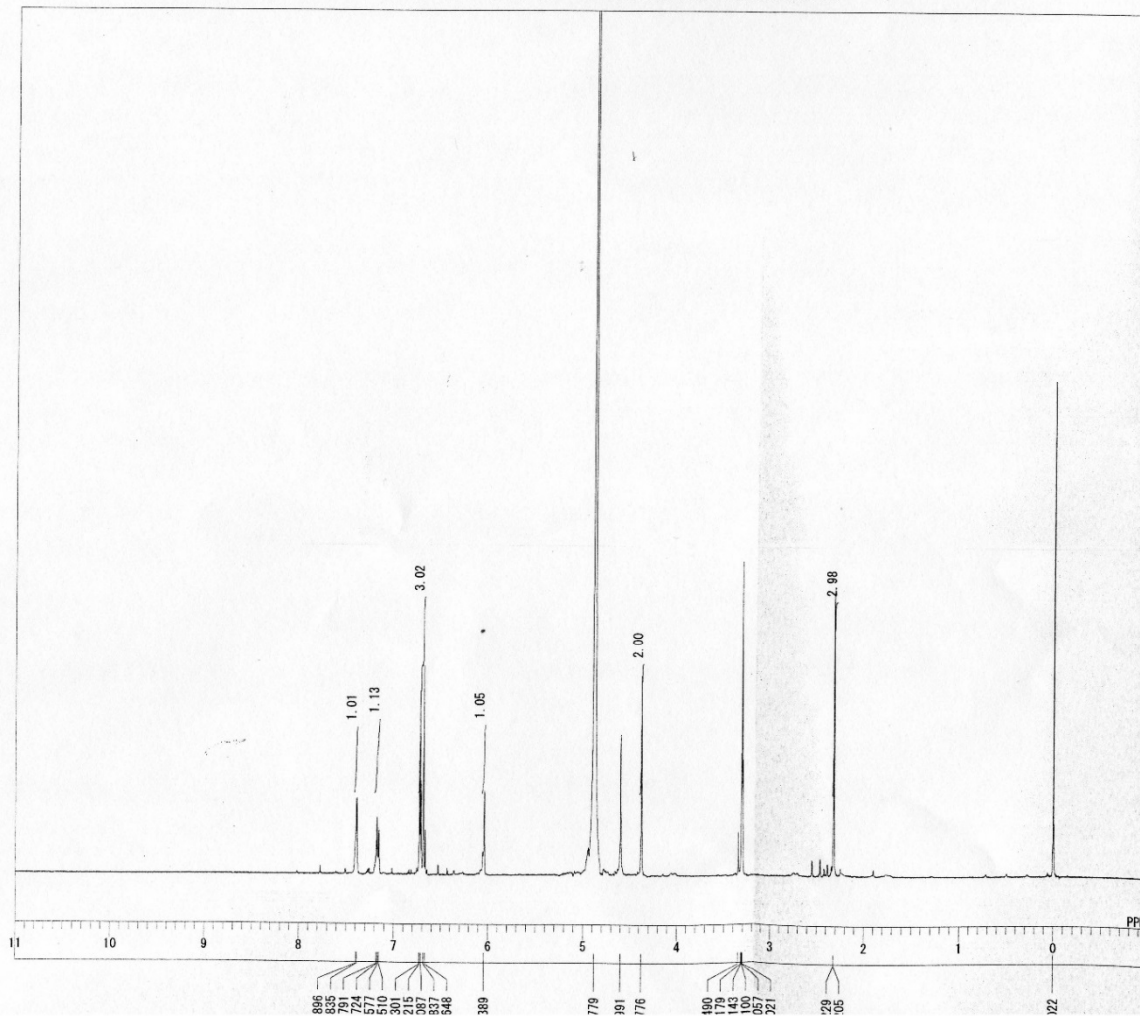

DFILE C:\Documents and Settings\JEOL\Desktop\data\ka  
COMNT  
DATIM Mon Aug 18 14:42:22 2014  
OBNUC 1H  
EXMCD NON  
OBFRQ 399.65 MHz  
OBSET 124.00 KHz  
OBF IN 10500.00 Hz  
POINT 32768  
FREQU 7992.01 Hz  
SCANS 8  
ACQTM 4.1001 sec  
PD 2.9010 sec  
PWI 5.90 usec  
IRNUC 1H  
CTEMP 20.9 c  
SLVNT CD3OD  
EXREF 3.31 ppm  
BF 0.12 Hz  
RGAIN 14

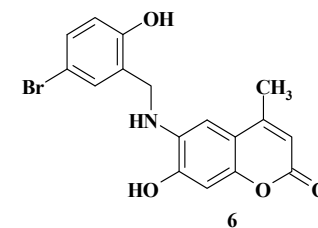

Figure S30.  $^1\text{H}$ -NMR of compound 6.



C:\Documents and Settings\JEOL\Desktop\data\kamikawa\RADWAN\_NEW\7-hydroxy coumarin\6-amino\13CNMR\final 5-Br-2-OCH3.als

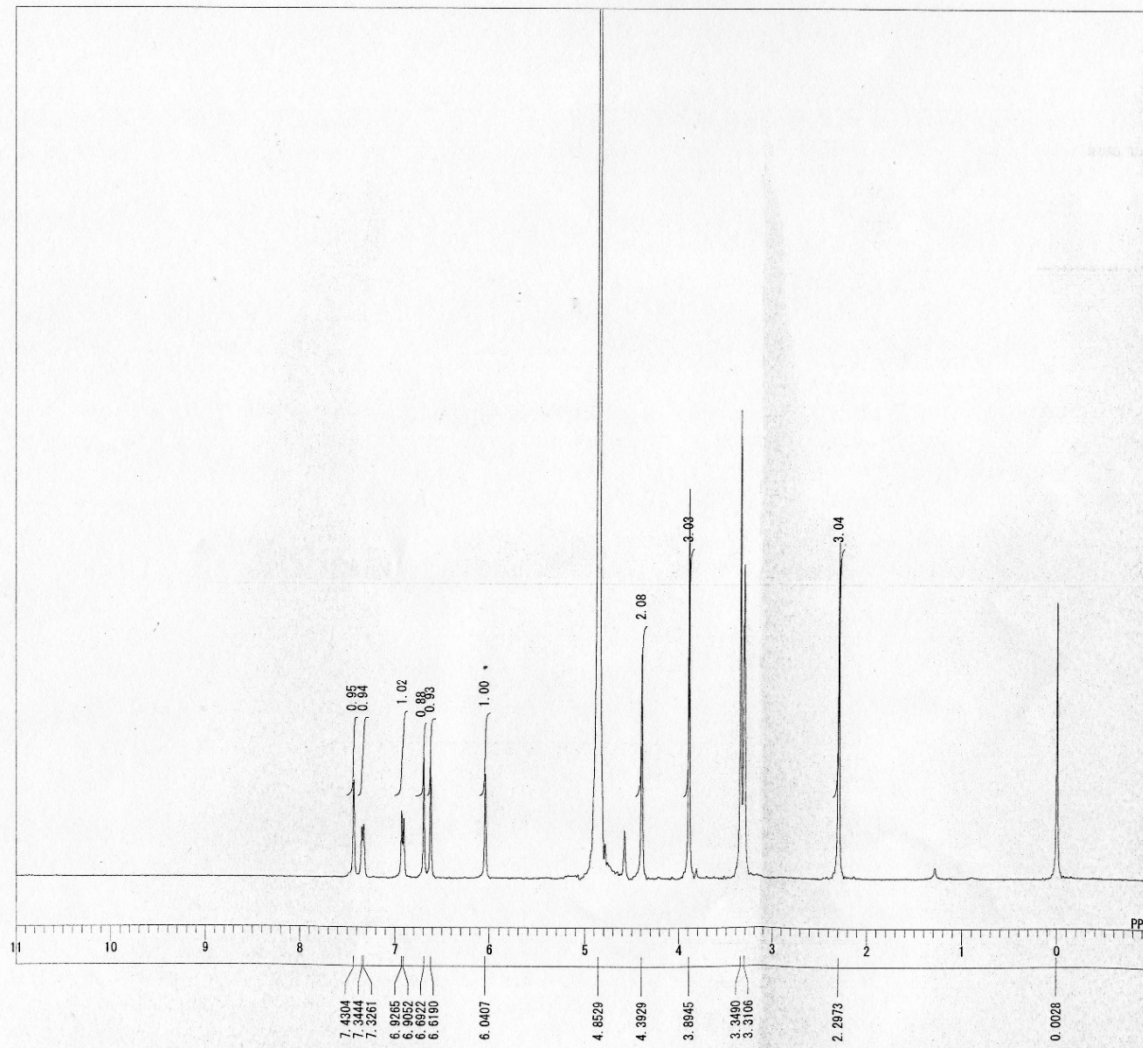

DFILE C:\Documents and Settings\JEOL\Desktop\data\k  
COMNT  
DATIM Sat Aug 16 21:34:05 2014  
OBNUC 1H  
EXMOD NON  
OBFRQ 399.65 MHz  
OBSET 124.00 KHz  
OBF1N 10500.00 Hz  
POINT 32768  
FREQU 7992.01 Hz  
SCANS 8  
ACQTM 4.1001 sec  
PD 2.9010 sec  
PWI 5.90 usec  
IRNUC 1H  
CTEMP 22.8 c  
SLVNT CD3OD  
XREF 3.31 ppm  
BF 1.20 Hz  
RGAIN 18

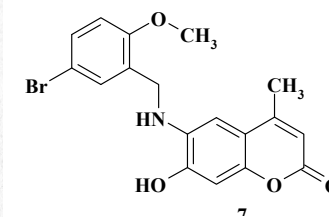Figure S32. <sup>1</sup>H-NMR of compound 7.



C:\Documents and Settings\KJEOL\Desktop\data\kanikawa\RADWAN NEW7-hydroxy coumarin\6-amino\13CNMR\final 5-Br-2-OCH3 new.als

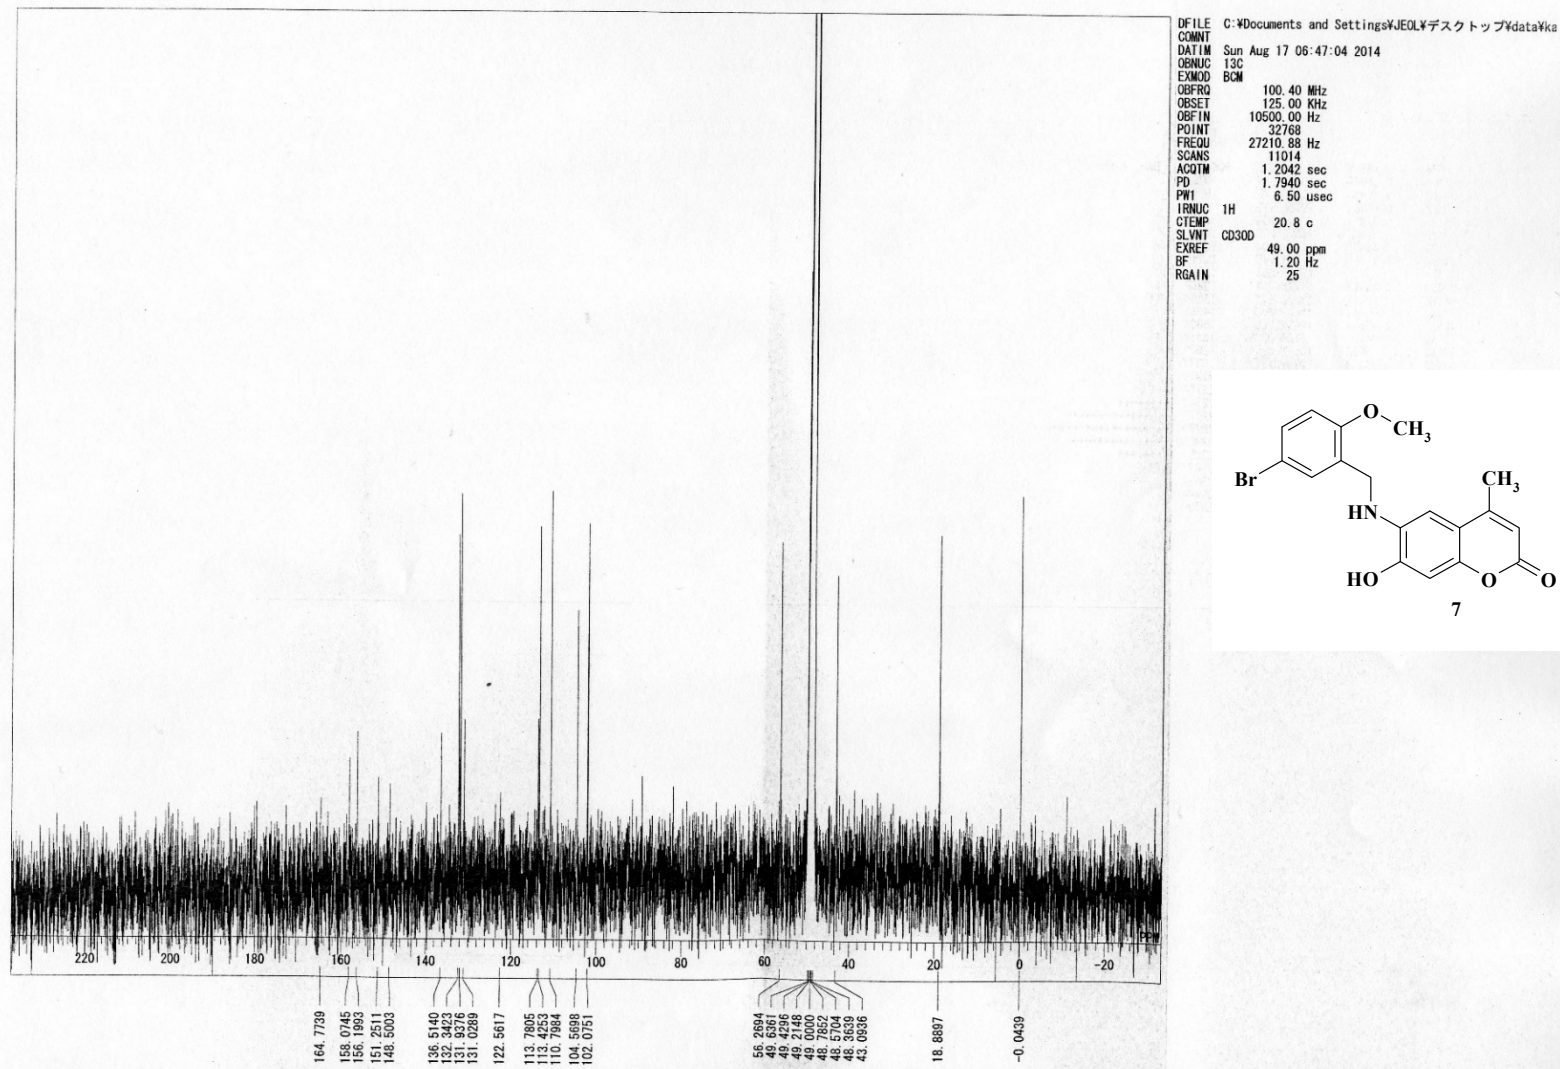Figure S33.  $^{13}\text{C}$ -NMR of compound 7.

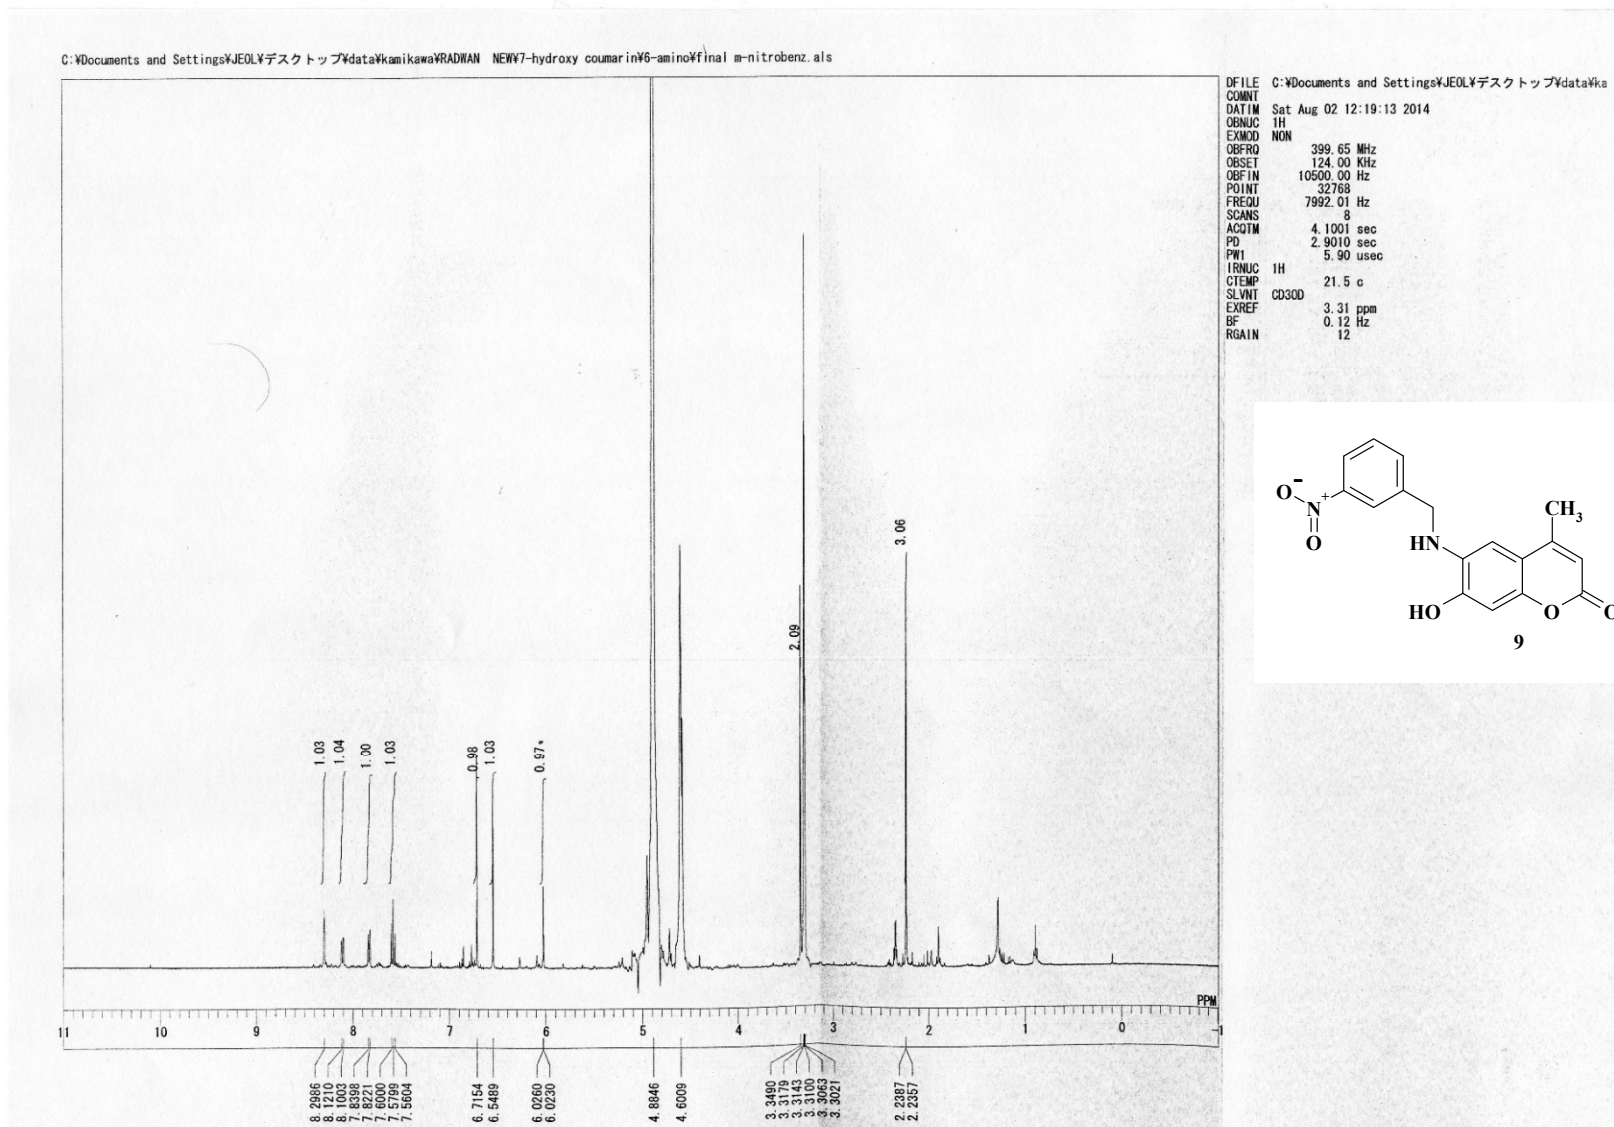Figure S34. <sup>1</sup>H-NMR of compound 9.

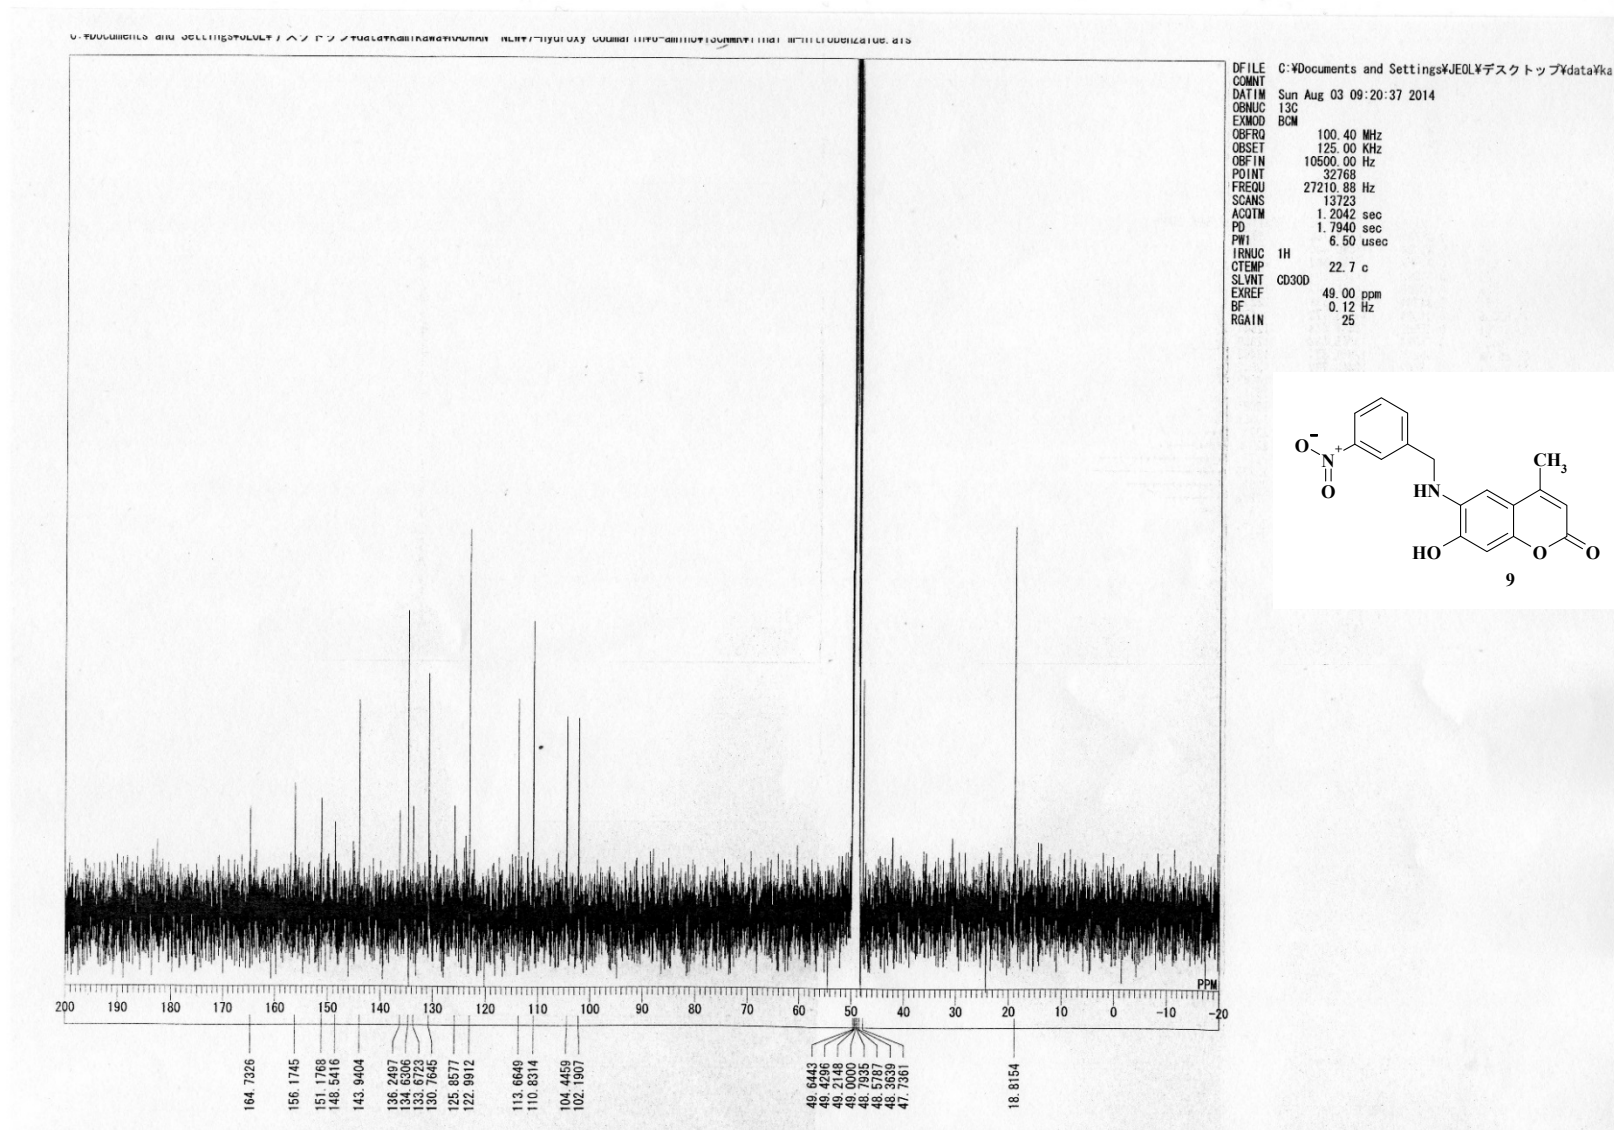Figure S35.  $^{13}\text{C}$ -NMR of compound 9.
